# Supplementary material for: MinION™ nanopore sequencing of environmental metagenomes: a synthetic approach
Source: PubMed Central journal article supplement (PMC5467020; doi:10.1093/gigascience/gix007), 2017-02-24

# 1 MinION™ nanopore sequencing of environmental metagenomes: a synthetic approach

2  
3  
4 3 Bonnie L. Brown, Virginia Commonwealth University, Department of Biology, 1000 W Cary Street,

5  
6 4 Richmond, VA 23284, USA, [blbrown@vcu.edu](mailto:blbrown@vcu.edu)

7  
8 5 Mick Watson, The Roslin Institute, University of Edinburgh, Division of Genetics and Genomics,

9  
10 6 Easter Bush, Midlothian, EH25 9RG, UK, [mick.watson@roslin.ed.ac.uk](mailto:mick.watson@roslin.ed.ac.uk)

11  
12 7 Samuel S. Minot, One Codex, 165 11<sup>th</sup> St, San Francisco, CA 94103, USA, [sam@onecodex.com](mailto:sam@onecodex.com)

13  
14 8 Maria C. Rivera, Virginia Commonwealth University, Department of Biology, 1000 W Cary Street,

15  
16 9 Richmond, Virginia 23284, USA, [mcrivera@vcu.edu](mailto:mcrivera@vcu.edu)

17  
18 10 Rima B. Franklin, Virginia Commonwealth University, Department of Biology, 1000 W Cary Street,

19  
20 11 Richmond, Virginia 23284, USA, [rbfranklin@vcu.edu](mailto:rbfranklin@vcu.edu)

21  
22 12  
23  
24  
25  
26 13 **Corresponding author:** Bonnie L. Brown, [blbrown@vcu.edu](mailto:blbrown@vcu.edu)

## 27 28 29 30 31 15 **Abstract**

32  
33 16 **Background:** Environmental metagenomic analysis is typically accomplished by assigning

34  
35 17 taxonomy and/or function from whole genome sequencing (WGS) or 16S amplicon sequences.

36  
37 18 Both of these approaches are limited, however, by read length, among other technical and

38  
39 19 biological factors. A nanopore-based sequencing platform, MinION™, produces reads that are

40  
41 20  $\geq 1 \times 10^4$  bp in length, potentially providing for more precise assignment, thereby alleviating some

42  
43 21 of the limitations inherent in determining metagenome composition from short reads. We tested

44  
45 22 the ability of sequence data produced by MinION (R7.3 flow cells) to correctly assign taxonomy

46  
47 23 in single bacterial species runs and in three types of low complexity synthetic communities: a

48  
49 24 mixture of DNA using equal mass from four species, a community with one relatively rare (1%)

50  
51 25 and three abundant (33% each) components, and a mixture of genomic DNA from 20 bacterial

52  
53 26 strains of staggered representation. Taxonomic composition of the low-complexity communities

54  
55  
56  
57  
58  
59  
60  
61  
62  
63  
64  
65

27 was assessed by analyzing the MinION sequence data with three different bioinformatic  
28 approaches : Kraken, MG-RAST, and One Codex.

29  
30 **Results:** Long read sequences generated from libraries prepared from single strains using the  
31 version 5 kit and chemistry, run on the original MinION device, yielded as few as 224 to as many  
32 as 3,497 bidirectional high-quality (2D) reads with an average overall study length of 6,000 bp.  
33 For the single-strain analyses, assignment of reads to the correct genus by different methods  
34 ranged from 53.1% to 99.5%, assignment to the correct species ranged from 23.9% to 99.5%, and  
35 the majority of mis-assigned reads were to closely related organisms. A synthetic metagenome  
36 sequenced with the same setup yielded 714 high quality 2D reads of approximately 5,500 bp that  
37 were up to 98% correctly assigned to the species level. Synthetic metagenome ~~from~~ MinION  
38 libraries generated using version 6 kit and chemistry yielded 899-3,497 2D reads with lengths  
39 averaging 5,700 bp with up to 98% assignment accuracy at the species-level. The observed  
40 community proportions for “equal” and “rare” synthetic libraries were close to the known  
41 proportions, deviating from 0.1 – 10% across all tests. For a 20-species mock community with  
42 staggered contributions, a sequencing run detected all but 3 species (each included at <0.05% of  
43 DNA in the total mixture); 91% of reads were assigned to the correct species, 93% of reads were  
44 assigned to the correct genus, and >99% of reads were assigned to the correct family.

45  
46 **Conclusions:** At the current level of output and sequence quality (just under  $4 \times 10^3$  2D reads for a  
47 synthetic metagenome), MinION sequencing followed by Kraken or One Codex analysis has the  
48 potential to provide rapid and accurate metagenomic analysis where the consortium is comprised  
49 of a limited number of taxa. Important considerations noted in this study included: high  
50 sensitivity of the MinION platform to the quality of input DNA, high variability of sequencing  
51 results across libraries and flow cells, and relatively small numbers of 2D reads per analysis limit.  
52 Together, these limited detection of very rare components of the microbial consortia, and would  
53 likely limit the utility of MinION for the sequencing of high-complexity metagenomic

1 54 communities where thousands of taxa are expected. Furthermore, the limitations of the currently  
2 55 available data analysis tools suggest there is considerable room for improvement in the analytical  
3  
4 56 approaches for the characterization of microbial communities using long reads. Nevertheless, the  
5  
6 57 fact that the accurate taxonomic assignment of high quality reads generated by MinION is  
7  
8 58 approaching 99.5% and, in most cases, the inferred community structure mirrors the known  
9  
10 59 proportions of a synthetic mixture, warrants further exploration of practical application to  
11  
12 60 environmental metagenomics as the platform continues to develop and improve. With further  
13  
14 61 improvement in sequence throughput and error rate reduction, this platform shows great promise  
15  
16 62 for precise real-time analysis of the composition and structure of more complex microbial  
17  
18 63 communities.  
19  
20  
21

22 64

#### 23 65 **Keywords**

24  
25  
26 66 MinION™, Oxford Nanopore Technologies, metagenome, whole-genome sequencing, long-read  
27  
28 67 sequencing  
29

30 68

#### 31 69 **Background**

32  
33 70 Environmental metagenomics, employing whole genome sequence analysis to identify ecologically  
34  
35 71 and epidemiologically important components of sediments, soils, waters, and surfaces, is rapidly  
36  
37 72 evolving through advances in both hardware and software [1]. Knowledge of the consortia that  
38  
39 73 inhabit these ecosystems allows for better understanding of the organisms and their ecological roles,  
40  
41 74 provides for the development of effective strategies to mitigate ecosystem damage, and facilitates  
42  
43 75 evaluation of the responses of species to environmental change. One common approach in  
44  
45 76 environmental metagenomics involves sequencing and subsequent annotation of whole genome  
46  
47 77 nucleic acid fragments (WGS) extracted directly from environmental samples to discover major  
48  
49 78 microbial members of the ecosystem; if sequenced deeply enough, rare species can be detected [2].  
50  
51 79 For well-studied members of the microbial community, such metagenomic data also can be used to  
52  
53 80 characterize the functional potential of complex communities.  
54  
55  
56  
57  
58  
59  
60  
61  
62  
63  
64  
65

1 81 One technique for characterizing environmental metagenomes is to use short-read high-  
2 82 throughput sequencing followed by mapping the reads to reference genomes. Profiling the taxonomic  
3  
4 83 composition of the community also can be accomplished by the analysis of the distribution of k-mers  
5  
6 84 (e.g., using Kraken or One Codex). Although these methodologies are very powerful due to the depth  
7  
8 85 of sequencing, the capacity to resolve the taxonomy of the community to the species level is limited  
9  
10 86 by read length. One approach to overcome this limitation is to assemble short reads into contigs prior  
11  
12 87 to analysis and annotation. If assembled correctly, the longer sequence lengths of the contigs have a  
13  
14 88 greater chance of accurately identifying the members of the community; however, due to the mixed  
15  
16 89 nature of the samples, such assembly approaches are challenged by many artifacts including chimeric  
17  
18 90 contigs that inappropriately combine sequence reads from multiple species. The high information  
19  
20 91 content of very long reads such as those provided by MinION™ (Oxford Nanopore Technologies,  
21  
22 92 Inc., Oxford, UK) has the potential to overcome some of the limitations of short reads by allowing for  
23  
24 93 longer alignments that potentially can contribute to higher taxonomic specificity, functional  
25  
26 94 characterization, and resolution. Although conceived almost two decades ago [3], nanopore-based  
27  
28 95 whole-molecule sequencing has only recently become available to MinION™ Access Programme  
29  
30 96 (MAP) participants for exploration and practical application [4]. Data generated by early access  
31  
32 97 MinION™ flow cells have been assessed for whole genome sequencing [5, 6, 7, 8, 9], gene  
33  
34 98 expression and transcriptome studies [10, 11, 12], clinical applications such as inferring antibiotic  
35  
36 99 resistance of bacterial strains and the detection of influenza and Ebola virus [13, 14, 15], bacterial  
37  
38 100 and viral serotyping [16], and clinical metagenomes of viral pathogens [17]. Efforts to use this  
39  
40 101 technology to study diverse environmental communities have been limited [18] and there has not  
41  
42 102 been, to our knowledge, any cross-validation of the results or any systematic assessment to determine  
43  
44 103 the best data analysis strategies for nanopore-based environmental metagenomics. To investigate the  
45  
46 104 potential of this platform for broader applications, we performed a set of experiments to quantify the  
47  
48 105 ability of MinION™ long-read sequence data to accurately characterize the taxonomic composition  
49  
50 106 and structure of metagenomes by assessing its performance in the characterization of low complexity  
51  
52 107 synthetic metagenomes.  
53  
54  
55  
56  
57  
58  
59  
60  
61  
62  
63  
64  
65

108

1  
2 **109 Data description**  
3

4 110 The raw MinION data [19] collected during sequencing by MinKNOW software (versions 0.49.2.9  
5  
6 111 through 0.51.3.40 b201605171140) were immediately uploaded as FAST5 packets to Metrichor  
7  
8  
9 112 Agent (r7.3 2D basecalling, ver rx-2.22-44717-dg-1.6.1-ch-1.6.3; Mk1 2D base-calling, ver WIMP  
10  
11 113 Bacteria k24 for SQK-MAP006), after which base-called data [19] were returned to the host  
12  
13 114 computer, also in the form of FAST5 files. The programs poRe [20], Poretools [21], and NanoOK  
14  
15 115 [22] were used to extract and characterize the numbers of reads and channels, after which only the 2D  
16  
17 116 reads were stored in FASTQ and FASTA files for downstream analyses. The base-called data sets  
18  
19 117 were scrutinized by methods commonly employed in metagenome analysis of short reads including  
20  
21 118 MG-RAST [23], which assigns taxonomy based on predicted proteins and rRNA genes. The data sets  
22  
23 119 also were analyzed by tools that have been shown to work for long-read data including: (1) WIMP  
24  
25 120 [24], which assigns taxonomy by comparing read sequences against a database of bacteria, (2) Kraken  
26  
27 121 [25], which uses exact alignments of *k-mers* and indexes more than 5000 genomes and plasmids, (3)  
28  
29 122 One Codex [26], which uses exact *k-mer* alignment to classify sequences against a reference database  
30  
31 123 of ~40,000 complete microbial genomes (including bacteria, viruses, fungi, protists, and archaea), and  
32  
33 124 (4) by principal components analysis (PCA) based on the frequency of 5-mers in each read followed  
34  
35 125 by annotation of reads with the top BlastN [27] hit (carried out in R [28]). Specific parameters are  
36  
37 126 described in Methods.  
38  
39  
40  
41  
42  
43

44 **128 Results**  
45

46 129 MinION™ WGS libraries were generated from 1 µg of fresh DNA isolates (see Methods) of separate  
47  
48 130 cultures of two Proteobacteria, *Escherichia coli* and *Pseudomonas fluorescens*, and two  
49  
50 131 Cyanobacteria, *Microcystis aeruginosa*, and *Synechococcus elongatus*, and from two different DNA  
51  
52 132 mixtures of these four species. One mixture combined an equal mass of genomic DNA (gDNA) from  
53  
54 133 each of the four species. The other mixture was created by combining 33% mass of gDNA from each  
55  
56 134 of three species and only 1% of gDNA mass from the other species. The preparation of these libraries  
57  
58  
59  
60  
61  
62  
63  
64  
65

135 yielded sufficient Pre-sequencing Mix for multiple loads of each flow cell. An additional library was  
136 derived from a commercially prepared 20-species mock community. Because only 100 ng of material  
137 was provided by the supplier, genome pre-amplification using  $\Phi$ 29 polymerase was required to  
138 generate sufficient mass of DNA to create the sequencing library (see Methods).

139 To assess the purity of the cultures used in this study, we used the Sanger method to sequence  
140 full-length (~1500 bp) 16S amplicons from each (Table 1). Inspection of those data revealed varying  
141 degrees of genomic uniqueness at the species level. For the strain of *M. aeruginosa* used in this  
142 study, the top 16S hit had a low sequence identity to any reference sequence in the database (90%).  
143 In contrast, the input strain of *S. elongatus* was 99% identical to two different species of  
144 *Synechococcus* (*S. elongatus* and *S. UTEX 2973*). In addition, whole-genome alignment indicated  
145 that the input strain of *P. fluorescens* was highly similar to multiple species of *Pseudomonas*.  
146 However, all of the input organisms were distinct at the genus level, thus that taxonomic level was  
147 used for downstream analysis of the single-species and ‘Equal’ and ‘Rare’ synthetic samples.

148 MinION sequencing of the single-species libraries generated up to  $31 \times 10^3$  reads ( $0.2$ – $1.1 \times 10^3$  2D  
149 reads that passed the quality filter) ranging from as short as 5 bp to as long as  $267 \times 10^3$  bp (data  
150 include both 2D pass and fail reads), and the resulting average length of single-species read subjected  
151 to downstream analysis was  $6 \times 10^3$  bp. Using MG-RAST, Kraken, and One Codex, up to 99.5% of  
152 the high quality 2D reads obtained from the sequencing of the single-species libraries of *E. coli*, *P.*  
153 *fluorescens*, *S. elongatus*, and *M. aeruginosa* were taxonomically assigned to the corresponding input  
154 taxa (Table 3). The least accurate assignments were for *M. aeruginosa*, where at best 58% of 2D  
155 reads were correctly assigned to the level of species, although more than half of the mis-assigned  
156 reads were to closely related cyanobacteria genera and other prokaryotes known to break down  
157 microcystin [29] (data not shown). All three methods of analysis assigned sequence reads of the *P.*  
158 *fluorescens* single-species library to *Stenotrophomonas*. Over all of these analyses, MG-RAST  
159 generally showed the lowest rate of correct taxonomic assignment and, although One Codex and  
160 Kraken provided similar results, Kraken showed a lower rate of correct assignment for *M. aeruginosa*  
161 (85%) compared to One Codex (95%).

162 In the second round of validation, using three synthetic communities containing mixtures of the  
163 previously described species,  $6\text{--}12\times 10^3$  reads ( $0.7\text{--}1.3\times 10^3$  2D reads) were generated per run, ranging  
164 in length from  $0.6\text{--}56.8\times 10^3$  bp (Table 2). For the two communities comprised of equal DNA  
165 contribution from four bacteria (25% each species), WGS proportions accurately aligned with the  
166 known proportions 87–99% of the time when analyzed using Kraken or One Codex and 65–85%  
167 using MG-RAST (Table 3). Specifically, taxonomic assignment of reads obtained from the  
168 sequencing of the equal mixture of four species (25% of each) using version 5 chemistry and run on  
169 an original MinION device identified the following taxa: 27% *E. coli*, 16% *M. aeruginosa*, 30% *P.*  
170 *fluorescens*, 21% *S. elongatus*, 3% Enterobacteriaceae, and 3% misclassified. In a subsequent test  
171 (version 6 chemistry), classification results for the equal mixture were: 26% *E. coli*, 18% *M.*  
172 *aeruginosa*, 30% *P. fluorescens*, 22% *S. elongatus*, and 3% Enterobacteriaceae, and 1% misclassified  
173 (Figure 1). For the community with three common (33% of each) and one rare (1%) representative,  
174 classifications were: 33% *E. coli*, 34% *P. fluorescens*, 29% *S. elongatus*, 1% *M. aeruginosa*, 2%  
175 misclassified (a third of those latter category of reads were assigned to *Shigella*). For both the  
176 “Equal” and “Rare” community data sets, the 5-mer frequency profiles were computed and visualized  
177 using the top BlastN hit for each full read, revealing that 5-mer profiles for these long-read sequences  
178 were shared within species. This was reflected in the 5-mer frequency analysis which revealed  
179 distinct per-species clusters in the PCA plots (Figure 2).

180 In the final round of testing, the mock microbial community with 20 species included in  
181 “staggered” proportions (i.e., 1,000 to 1,000,000 16S rRNA operon copies per organism per  $\mu\text{L}$  of  
182 material supplied by BEI Resources, Catalog # HM-783D) yielded  $14.7\times 10^3$  reads ( $3.5\times 10^3$  2D reads)  
183 ranging in length from  $0.5\text{--}20.9\times 10^3$  bp, sufficient to detect all of the high and moderate abundance  
184 species, but the sequencing run failed to detect 3 of 5 species that were included at very low mass  
185 ( $0.6\text{--}1.0$  pg/ $\mu\text{L}$  of material supplied; Table 4). For that run, misclassifications accounted for only  
186 0.2% of read assignments but greatly overrepresented in the results for this run were reads assigned to  
187 *E. coli* (included as 20% of DNA but observed as 46–52% of read assignments), whereas greatly  
188 underrepresented in the results were reads assigned to *R. sphaeroides*, which was putatively included

189 as 41% of DNA mass but accounted for only 1% of read assignments (Figure 3). Although 75% of  
 190 the read assignments made by WIMP were to genera known to comprise the mock community, 93%  
 191 of the read assignments made by One Codex matched the correct genera.

192  
193

194 **Table 1** Identity of single-species used in this study as determined by Sanger sequencing of  
 195 16S rDNA amplicons from different DNA preparations of each species.

| Culture <sup>a</sup>           | Final sequence Length (bp) | Sequence matches in BlastN |                                                                                       |
|--------------------------------|----------------------------|----------------------------|---------------------------------------------------------------------------------------|
|                                |                            | %                          | Organism                                                                              |
| <i>Escherichia coli</i>        | 1440–1696 <sup>a</sup>     | 98                         | <i>E. coli</i> numerous strains                                                       |
| <i>Microcystis aeruginosa</i>  | 1418                       | 90                         | <i>M. aeruginosa</i> NIES-843 and NIEHS-2549,<br>and <i>M. panniformis</i> FACHB-1757 |
| <i>Pseudomonas fluorescens</i> | 1478–1570                  | 96                         | <i>P. fluorescens</i> A506 and LBUM223                                                |
| <i>Synechococcus elongatus</i> | 1431–1719                  | 99                         | <i>S. elongatus</i> PCC 7942, PCC 6301, UTEX 2973                                     |

196 <sup>a</sup> Multiple DNA preparations from bacterial cultures were used during the progress of the study, and each was tested,  
 197 yielding for each strain slightly different final 16S sequence lengths, but the same BLAST matches.

198  
199

200 **Table 2** Details of MinION™ whole genome sequencing output for single-species and  
 201 synthetic mixtures. Sequencing experiments used the MinION device and new R7.3  
 202 flow cells. Libraries were prepared with kit SQK–MAP005 as indicated by (5) and  
 203 SQK–MAP006 chemistry, indicated by (6). Columns relating to “2D” indicate bi-  
 204 directional reads with quality above Q9.

| Experiment (chemistry)               | Pores with reads | Run time (hr) <sup>a</sup> | Total bp (Mbp) | Total reads | Number of 2D pass reads | Mean 2D read length (bp) | MG-RAST accession | ENA accession |
|--------------------------------------|------------------|----------------------------|----------------|-------------|-------------------------|--------------------------|-------------------|---------------|
| Single species                       |                  |                            |                |             |                         |                          |                   |               |
| <i>E. coli</i> <sup>(5)</sup>        | 430              | 42                         | 83.6           | 26590       | 1112                    | 5274                     | 4629367.3         | ERR1713483    |
| <i>P. fluorescens</i> <sup>(5)</sup> | 453              | 48                         | 119.4          | 25228       | 777                     | 7784                     | 4629445.3         | ERR1713487    |



|                                     |     |    |      |       |      |      |           |            |
|-------------------------------------|-----|----|------|-------|------|------|-----------|------------|
| <i>M. aeruginosa</i> <sup>(5)</sup> | 377 | 18 | 40.8 | 22760 | 569  | 5676 | 4629369.3 | ERR1713486 |
| <i>S. elongatus</i> <sup>(5)</sup>  | 367 | 23 | 18.3 | 6163  | 224  | 5101 | 4629381.3 | ERR1713489 |
| Mixtures                            |     |    |      |       |      |      |           |            |
| Equal <sup>(5)</sup>                | 129 | 24 | 26.5 | 10592 | 714  | 5527 | 4614572.3 | ERR1713484 |
| Equal <sup>(6)</sup>                | 437 | 44 | 77.1 | 12174 | 1358 | 5202 | 4685746.3 | ERR1713485 |
| Rare <sup>(6)</sup>                 | 449 | 18 | 39.0 | 6728  | 899  | 6194 | 4685745.3 | ERR1713488 |
| Staggered <sup>(6)</sup>            | 300 | 33 | 39.0 | 14711 | 3497 | 2612 | 4705090.3 | ERR1713490 |

<sup>a</sup> Runs were set to either 24 or 48 hours and were allowed to continue until either sufficient sequence data were collected or until the 2D pass rate was greatly reduced.

**Table 3** Taxonomic assignment accuracy of metagenomic reads across three analysis methods.

| Accuracy of assignment to known genus (%) |                   |                   |                   |
|-------------------------------------------|-------------------|-------------------|-------------------|
| Experiment                                | MG-RAST           | Kraken            | One Codex         |
| Single species                            |                   |                   |                   |
| <i>E. coli</i> <sup>(5)</sup>             | 74.4 <sup>a</sup> | 99.5              | 98.7              |
| <i>P. fluorescens</i> <sup>(5)</sup>      | 84.9 <sup>b</sup> | 84.6 <sup>b</sup> | 84.2 <sup>b</sup> |
| <i>M. aeruginosa</i> <sup>(5)</sup>       | 53.1              | 85.8              | 95.1              |
| <i>S. elongatus</i> <sup>(5)</sup>        | 87.9              | 98.1              | 97.6              |
| Mixtures                                  |                   |                   |                   |
| Equal <sup>(5)</sup>                      | 65.0 <sup>b</sup> | 97.6              | 87.4 <sup>c</sup> |
| Equal <sup>(6)</sup>                      | 85.9              | 98.0              | 98.7              |
| Rare <sup>(6)</sup>                       | 92.9              | 99.1              | 98.7              |

<sup>a</sup> 15% of reads assigned to *Shigella*

<sup>b</sup> 7-15% of reads assigned to *Stenotrophomonas*

<sup>c</sup> 7% of reads assigned to *Stenotrophomonas*

Accuracy was calculated as the proportion of reads assigned to the known input organism at the genus level out of the total number reads given any assignment at that rank.

**Table 4** Known composition of 20-species mock staggered community compared with analysis results for WIMP and One Codex. “nd”: not detected.

| Organism | Operon count/μL <sup>a</sup> | Quantity pg/μL <sup>b</sup> | % DNA in template <sup>c</sup> | WIMP % species | WIMP % genus | One Codex % species | One Codex % genus |
|----------|------------------------------|-----------------------------|--------------------------------|----------------|--------------|---------------------|-------------------|
|----------|------------------------------|-----------------------------|--------------------------------|----------------|--------------|---------------------|-------------------|

|                                   |           |       |       |                    |                    |                   |                   |
|-----------------------------------|-----------|-------|-------|--------------------|--------------------|-------------------|-------------------|
| <i>Acinetobacter baumannii</i>    | 10,000    | 8.2   | 0.24  | 0.14               | 0.14               | 0.29              | 0.29              |
| <i>Actinomyces odontolyticus</i>  | 1,000     | 1     | 0.03  | nd                 | nd                 | nd                | nd                |
| <i>Bacillus cereus</i>            | 100,000   | 45    | 1.33  | 0.53               | 0.53               | 0.66              | 0.75              |
| <i>Bacteroides vulgatus</i>       | 1,000     | 0.8   | 0.02  | 0.1                | 0.1                | 0.07              | 0.12              |
| <i>Clostridium beijerinckii</i>   | 100,000   | 44    | 1.30  | 0.19               | 0.19               | 0.29              | 0.35              |
| <i>Deinococcus radiodurans</i>    | 1,000     | 1     | 0.03  | 0.05               | 0.05               | 0.07              | 0.06              |
| <i>Enterococcus faecalis</i>      | 1,000     | 0.7   | 0.02  | nd                 | nd                 | nd                | nd                |
| <i>Escherichia coli</i>           | 1,000,000 | 680   | 20.04 | 45.61              | 45.66              | 52.15             | 52.52             |
| <i>Helicobacter pylori</i>        | 10,000    | 8.6   | 0.25  | 1.68               | 1.68               | 3.43              | 2.72              |
| <i>Lactobacillus gasseri</i>      | 10,000    | 3.2   | 0.09  | 0.14               | 0.14               | 0.22              | 0.23              |
| <i>Listeria monocytogenes</i>     | 10,000    | 5     | 0.15  | 0.38               | 0.38               | 0.58              | 0.52              |
| <i>Neisseria meningitidis</i>     | 10,000    | 5.8   | 0.17  | 0.24               | 0.24               | 0.44              | 0.41              |
| <i>Propionibacterium acnes</i>    | 10,000    | 8.8   | 0.26  | 0.48               | 0.48               | 0.07              | 0.64              |
| <i>Pseudomonas aeruginosa</i>     | 100,000   | 160   | 4.71  | 1.25               | 1.25               | 3.07              | 3.18              |
| <i>Rhodobacter sphaeroides</i>    | 1,000,000 | 1,400 | 41.25 | 1.01               | 1.01               | 1.46              | 1.27              |
| <i>Staphylococcus aureus</i>      | 100,000   | 59    | 1.74  | 0.38               | 3.88               | 1.31              | 12.74             |
| <i>Staphylococcus epidermidis</i> | 1,000,000 | 510   | 15.03 | 7.67               | 7.72               | 6.65              |                   |
| <i>Streptococcus agalactiae</i>   | 100,000   | 32    | 0.94  | 0.96               | 1.01               | 0.95              | 16.97             |
| <i>Streptococcus mutans</i>       | 1,000,000 | 420   | 12.38 | 10.17              | 10.17              | 19.50             |                   |
| <i>Streptococcus pneumoniae</i>   | 1,000     | 0.6   | 0.02  | nd                 | nd                 | nd                |                   |
| Other                             |           | 0     | 0     | 29.02 <sup>d</sup> | 25.37 <sup>e</sup> | 8.77 <sup>f</sup> | 7.24 <sup>g</sup> |
| Correct assignments               |           |       |       | 70.98              | 74.63              | 91.23             | 92.76             |

<sup>a</sup>Theoretical copy number provided by BEI Resources certificate of analysis

<sup>b</sup>gDNA content provided by BEI Resources certificate of analysis

<sup>c</sup>Proportion of individual species within the mock community.

<sup>d</sup>Of these, 12.7% were correctly assigned to genus, 86.4% were Enterobacteriaceae, and only 0.7% were misclassifications.

<sup>e</sup>Of these, 86.4% were Enterobacteriaceae and only 0.7% were misclassified.

<sup>f</sup>Of these, 56.8% were *Shigella*.

<sup>g</sup>Of these, 63.3% were species of *Escherichia* and *Shigella*.

## Discussion

Sequencing of whole genome libraries can enhance environmental metagenomic analysis by providing more precise identification of the composition and structure of the community than is

228 possible by amplicon sequencing of marker genes (e.g., 16S) [2, 30]. Typical environmental samples  
1  
2 229 contain tens of thousands to millions of organisms, yet the resulting metagenomes almost certainly  
3  
4 230 underrepresent this diversity and, often due to short-read strategy, the resulting data sets can be  
5  
6 231 confidently assigned only to higher taxonomic levels [31, 32]. One strategy to improve the accuracy  
7  
8 232 of taxonomic assignment is to carefully assemble metagenomic data, which despite the potential for  
9  
10 233 chimeric contig formation has been shown to greatly enhance species call correctness [33]. However,  
11  
12 234 even with enhanced sequencing and bioinformatic strategies, many public database accessions contain  
13  
14 235 sequences that are not innate to the species that was analyzed; these include symbionts, parasites,  
15  
16 236 pathogens, and sequencing linkers/primers/adapters (unbeknownst to those who have accessed the  
17  
18 237 data) that can lead to false discovery rates [34]. Contaminated and mis-annotated reference sequences  
19  
20 238 can affect environmental metagenome analyses that are derived from short reads to a greater extent  
21  
22 239 than would be expected from analyses based on long reads. Long reads can circumvent these issues  
23  
24 240 [31, 35, 36], so long as much of the genome for each component organism is represented in the  
25  
26 241 sequencing library and there are few errors in the sequences and the reference database. The results  
27  
28 242 reported here allow us to consider the potential utility of MinION long read sequencing and  
29  
30 243 subsequent bioinformatic analysis for shotgun environmental metagenomics.

31  
32  
33 244 The primary challenge of microbial metagenomic sequence analysis using long reads is the  
34  
35 245 comparison of input sequences against a large reference database of whole genomes from bacteria,  
36  
37 246 viruses, fungi, etc. Although a number of algorithms have been developed for alignment of long,  
38  
39 247 error-prone reads [37, 38], those sensitive algorithms are not optimized for the challenge of  
40  
41 248 comparison against the large and ever-expanding universe of microbial genomes. The bioinformatic  
42  
43 249 methods used in this analysis, MG-RAST, Kraken, One Codex, and WIMP, each compare the input  
44  
45 250 reads against their own more concise reference databases, providing an assignment for the most likely  
46  
47 251 origin of each individual sequence.

48  
49  
50  
51  
52  
53 252 We found that for low complexity synthetic communities, long reads generated by MinION  
54  
55 253 provided sufficiently precise sequence data to assign organisms represented at or above 1%. In fact,  
56  
57 254 two out of five species included at <0.05% in a mock community (and 9 out of 9 species included at  
58  
59 255 0.05-1.00%) were detected. Furthermore, for un-amplified whole genome preparations, read  
60  
61  
62  
63  
64  
65

256 assignments were observed to be within about 10% of their proportional occurrence in the  
1 metagenome. Ultimately, we saw that although the reads were longer, because the sequence coverage  
2 257 was not as deep, the improvement in specificity of assignment was offset by a reduction in the  
3  
4 258 sensitivity, and some of the genomes present at low concentration were not detected.  
5  
6 259

8  
9 260 By comparing the output of multiple analysis methods, we were able to gain insight into the  
10 performance of various bioinformatic approaches for analyzing error-prone MinION reads. Overall,  
11 261 MG-RAST provided the lowest level of accuracy and detected multiple organisms that were not a part  
12  
13 262 of the known input set. This is not surprising given that MG-RAST is optimized for analyzing short-  
14  
15 263 read, low-error data. Kraken and One Codex performed similarly for the single-species samples  
16  
17 264 except in the case of *M. aeruginosa*, in which case One Codex correctly identified this taxon at a  
18  
19 265 higher rate than Kraken (95% vs. 85%). For the equal mixture with the version 5 chemistry, Kraken  
20  
21 266 showed a higher rate of correct assignment than One Codex (97.6% vs 87.4%), although the two  
22  
23 267 methods were generally comparable (actually One Codex was slightly more accurate) for the equal  
24  
25 268 mixture when using version 6 of the MinION chemistry. An unexpected finding of this study was the  
26  
27 269 detection by all three methods of *Stenotrophomonas* in the *P. fluorescens* single-species sample.  
28  
29 270 Interestingly, *Stenotrophomonas* was classified as *Pseudomonas* when it was first discovered, based  
30  
31 271 on similar metabolic capabilities, and was later moved to its own genus based on molecular data [39].  
32  
33 272 Our 16S sequences derived from laboratory cultures used in this study did not identify  
34  
35 273 *Stenotrophomonas*, suggesting that its identification in the mixed metagenomes is not a result due to a  
36  
37 274 contaminant but rather, an artifact caused by assigning taxonomy to reads with multiple sequencing  
38  
39 275 errors. Also contributing to its identification is the fact that both *Pseudomonas* and  
40  
41 276 *Stenotrophomonas* share functional phenotypic characteristics, indicating they may share homologous  
42  
43 277 genes coding for those characteristics. The sharing of homologous genes, similar GC contents (both  
44  
45 278 species genomes have 66% GC), and the higher error rate are the most likely factors responsible for  
46  
47 279 the assignment of *Pseudomonas* sequence reads to *Stenotrophomonas*.  
48  
49 280

50  
51 281 The fact that the estimated proportions of community members in synthetic mixtures were not  
52  
53 282 precise despite careful DNA quantitation could indicate differences across library preparation (all  
54  
55 283 libraries were prepared by BLB), reagent kits, flow cells, MinKNOW control scripts, the quality of  
56  
57  
58  
59  
60  
61  
62  
63  
64  
65

284 DNAs used to create the synthetic metagenomes, and the methods used for quantification (Qubit for  
1 the home-grown mixtures and UV spectrophotometry for the 20-species mixture). Because DNA  
2 285 the home-grown mixtures and UV spectrophotometry for the 20-species mixture). Because DNA  
3  
4 286 quality is of paramount importance for MinION sequencing, PreCR (used in the version 5 protocol) or  
5  
6 287 FFPE Repair Mix (used in the version 6 protocol) was included in the preparation of all libraries. The  
7  
8 288 potential for profound effects related to library preparation recently was examined by Jones and  
9  
10 289 collaborators [30], leading to the recommendation that studies of complex metagenomes should be  
11  
12 290 based on PCR-free approaches. The current data indicate that the MinION lends itself well to a PCR-  
13  
14 291 free approach but its utility for the analysis of complex metagenomes is presently limited by the small  
15  
16 292 number of reads that pass the quality filtering process. The current study also provides data for  
17  
18 293 considering alternatives to PCR for amplification, in this case GenomiPhi™, which was used to  
19  
20 294 generate sufficient DNA for one library in the current study (“Staggered”). This method is optimized  
21  
22 295 for linear DNA and was intended to generate unbiased copies of the 20-species genomes.  
23  
24 296 Nevertheless, the Φ29 pre-amplification step is one possible reason for the overrepresentation of *E.*  
25  
26 297 *coli* and underrepresentation of *R. sphaeroides* in the sequencing of the 20 species mock community.  
27  
28 298 Also, a consequence of Φ29 pre-amplification combined with putative differences in DNA quality,  
29  
30 299 chimeric amplicons (known to occur with Φ29 amplification of microbial communities [40]) could  
31  
32 300 have been formed predominantly from higher quality *E. coli* DNA re-priming itself [41] leading to  
33  
34 301 overrepresentation of the *E. coli* component. Notably, a novel low input DNA approach recently  
35  
36 302 reported [42] could enhance MinION analyses of samples with low DNA yields. Although the pre-  
37  
38 303 amplification step is the most likely culprit, an additional effect that could contribute to incongruence  
39  
40 304 of known and estimated proportions in the 20 species mock community is that organisms for which  
41  
42 305 there are many accessions in the public databases provide for more precise classification (e.g., NCBI  
43  
44 306 has more than  $6 \times 10^5$  *E. coli* complete genome accessions) and that *vice versa*, organisms with  
45  
46 307 relatively few accessions (e.g., NCBI has only 116 *R. sphaeroides* complete genome accessions)  
47  
48 308 result in less precise classification.  
49  
50  
51  
52  
53  
54

55  
56 309 Despite the rather small number of 2D reads that were observed to pass the quality filter across all  
57  
58 310 MinION runs, there was a strong biological signal in the data (Figure 2). Thus, as investigators have  
59  
60  
61  
62  
63  
64  
65

1 found MinION useful for single genome introspection [6, 9, 15], 16S and other amplicon resolution  
2 [16, 43], cDNA sequencing [11], and assembly [5, 44, 45], our findings imply that this platform has  
3 immediate utility for analysis of very simple mixtures (e.g., serum testing for pathogens). Over the  
4 18-month period of MinION use for this set of experiments, 2D pass rates increased from 2% to 24%.  
5 Because the rate of improvement is concurrent with Moore's Law [46], we speculate that future  
6 improvements will make the MinION platform very useful in the analysis of complex metagenomic  
7 samples in the near future. The cloud-based WIMP base-calling and taxon prediction program  
8 associated with the device provides a method of real-time analysis of metagenomic data. However,  
9 because we had no control over the comparative database, the cloud implementation of WIMP was far  
10 less flexible for environmental metagenomic analysis than Kraken or One Codex, and we note that  
11 use of an incomplete database can lead to false positives and negatives. By the time of submission of  
12 this study, the R7.3 flow cells and sequencing chemistry were no longer available. Subsequent  
13 versions of the platform have shown dramatically lower error and higher throughput. This study  
14 nevertheless provides a baseline for considering nanopore metagenomics and provides an impetus for  
15 further development of MinION output and data analysis, specifically with regard to evaluation of the  
16 informative value of 1D reads, scrutiny of reference data, alternative alignment algorithms, and more  
17 sophisticated k-mer analyses. As the quality rate for this platform improves, the potential will  
18 increase for MinION to accurately resolve the diversity and composition of many of the taxa in an  
19 environmental metagenome.

## 20 **Methods**

21 To set a baseline of expectations for MinION metagenomic analysis, we performed single-species  
22 sequencing runs with four organisms. Cell cultures at log phase were harvested by spinning 15 mL  
23 culture tubes at  $3,000 \times g$  for 30 min, and DNA was isolated using the PowerSoil DNA kit (MoBio,  
24 Carlsbad, CA, USA) according to the manufacturer's instructions. Nucleic acid quality and quantity  
25 were checked via Nanodrop 2000 and Qubit, whereafter 1  $\mu\text{g}$  of DNA was used to prepare sequencing  
26 libraries. For the first two mixtures, equal portions of DNAs from all four organisms (250 ng each)

338 were used (“equal”) and, for the third mixture (“rare”), equivalent amounts of three of the species  
339 were used (330 ng each) and *M. aeruginosa* was included as only 1% of the mixture (10 ng). An  
340 additional preparation of a mock community containing DNA of 20 bacterial species in staggered  
341 amounts was obtained from a commercial source (Catalog # HM-783D, BEI Resources, ATCC,  
342 Manassas, VA, USA). This mock community preparation was chosen because it previously has been  
343 used to test the ability of the R7.3 version MinION to study microbial diversity via 16S amplicon  
344 approach [43]. However, because sequencing libraries for this study required 1 µg of DNA, to  
345 generate sufficient starting material 1 µL of the mock community sample (5.5 ng of template, the  
346 amount recommended by the supplier for a typical reaction) was pre-amplified using Φ29 enzyme  
347 from the GenomiPhi V3 kit (25-6601-24, GE Healthcare Bio-Sciences, Pittsburgh, PA, USA)  
348 according to the manufacturer’s recommendations. This version of Φ29 enzyme was chosen for  
349 isothermal pre-amplification due to the high-fidelity proof-reading aspects of its replication process  
350 [47].

351 The composition of each microbial mixture was calculated on the basis of the relative DNA mass  
352 contributed from each organism. Due to the random nature of shotgun sequencing, this library  
353 construction strategy is expected to result in a relative proportion of reads sequenced from each  
354 organism that corresponds to the relative input mass. In other words, the relative genome size of each  
355 organism should not have impacted the relative proportion of reads recovered from each organism.

356 Sequencing libraries were prepared for R7.3 flow cells run on an original MinION device using  
357 the Genomic DNA Sequencing Kit SQK–MAP005 (version 5 chemistry) according to the base  
358 protocol from Oxford Nanopore with slight modifications [48] and for flow cells run using the  
359 Nanopore Sequencing Kit SQK–MAP006 (version 6 chemistry) according to the manufacturer’s  
360 recommendations. The steps for library SQK–MAP005 preparation included in this order: shearing 1  
361 µg in a Covaris g-TUBE (Covaris, Inc., Woburn, MA, USA) at 2,000 × g for 2 min, treatment with  
362 PreCR (New England Biolabs, Beverly, MA, USA), cleanup with 1X AMPure beads (Agencourt,  
363 Beckman Coulter, Brea CA, USA), end-repair with NEBNext End Repair Module (New England  
364 Biolabs), cleanup with 0.5X AMPure beads, dA-tailing with NEBNext dA-Tailing Module (New

1 365 England Biolabs), ligation to a cocktail of both the leader and hairpin sequencing adapters (Oxford  
2 366 Nanopore Technologies) using Blunt TA Ligase (New England Biolabs), cleanup using his-tag  
3  
4 367 Dynabeads (Life Technologies, City, State, USA), and recovery of the pre-sequencing mix in 25  $\mu$ L  
5  
6 368 of Elution Buffer (Oxford Nanopore Technologies). After priming the flow cell with EP solution  
7  
8  
9 369 according to the manufacturer's recommendations, an initial 6  $\mu$ L aliquot of the pre-sequencing mix  
10  
11 370 (at 10-20 ng/ $\mu$ L) was combined with 141  $\mu$ L EP Solution and 3  $\mu$ L Fuel Mix and applied to the flow  
12  
13 371 cell. Thereafter, at 6-8 hr intervals, additional pre-sequencing mix aliquots (held on ice) combined  
14  
15  
16 372 with EP Solution and Fuel Mix were added to the flow cell at times roughly coinciding with re-  
17  
18 373 programmed pore "remux," which is a process that adjusts the bias voltage and mux channels to  
19  
20 374 maximize yield performance. Modified scripts (J. Tyson, pers. comm.) caused the MinION device to  
21  
22 375 perform four remux steps at 8 h intervals to maintain regular increases in data (Figure 4).

23  
24  
25 376 Steps for library SQK-MAP006 preparation included in this order: shearing in a Covaris g-TUBE  
26  
27 377 (Covaris, Inc., Woburn, MA, USA) at 2,000  $\times$  g for 2 min, treatment with PreCR (New England  
28  
29 378 Biolabs, Beverly, MA, USA), cleanup with 1X AMPure beads (Agencourt, Beckman Coulter, Brea  
30  
31 379 CA, USA), combined end-repair and dA-tailing with NEBNext UltraII End Repair/dA-Tailing  
32  
33 380 Module (New England Biolabs), cleanup with 1X AMPure beads, ligation to a cocktail of both the  
34  
35  
36 381 leader and hairpin sequencing adapters (Oxford Nanopore Technologies) using Blunt TA Ligase  
37  
38 382 (New England Biolabs), addition of a tether to the hairpin segment, cleanup using MyOne  
39  
40 383 Streptavidin C1 Beads (Life Technologies, Carlsbad, CA, USA), and recovery of the pre-sequencing  
41  
42 384 mix in 25  $\mu$ L of Elution Buffer (Oxford Nanopore Technologies). After priming the flow cell with  
43  
44  
45 385 running buffer and fuel according to the manufacturer's recommendations, an initial 6  $\mu$ L aliquot of  
46  
47  
48 386 the pre-sequencing mix (at 10-20 ng/ $\mu$ L) was combined with 75  $\mu$ L Running Buffer, 65  $\mu$ L water, and  
49  
50 387 4  $\mu$ L Fuel Mix and applied to the flow cell. Thereafter, at 8 hr intervals, additional pre-sequencing  
51  
52 388 mix aliquots (held on ice) were combined with Running Buffer and Fuel Mix and added to the flow  
53  
54  
55 389 cell at times roughly coinciding with re-programmed pore remux (modified scripts from J. Tyson,  
56  
57 390 pers. comm.) Modified remux scripts were not used for the final MinION run (Staggered community  
58  
59 391 analysis) because that run was controlled by a new version of MinKNOW.  
60  
61  
62  
63  
64  
65



392 Whole genome sequence data (2D FASTQ) from the MinION R7.3 flow cells were accessed on  
1  
2 393 the MG-RAST server [23] and annotated based on their predicted proteins and rRNA genes using the  
3  
4 394 BLAT annotation algorithm [49] against the M5NR protein Db, screened to remove any sequences  
5  
6 395 matching *H. sapiens* (none found), and without dereplication or dynamic trimming. Although  
7  
8 396 optimized for short read data, the MG-RAST tools were implemented because they allow query of a  
9  
10 suite of comprehensive nonredundant genetic databases and because this server provides a means to  
11 397  
12 share both raw data and computational results. Raw read counts were later accessed from MG-RAST  
13 398  
14 using the API endpoint for organism summaries. The recommended parameters “hit\_type=single”,  
15 399  
16 “source=RefSeq”, and “evaluate=15” were used to generate the appropriate read-level abundance  
17 400  
18 information. The same read sets (2D FASTA) also were analyzed by Kraken [25] using the default k-  
19 401  
20 mer size, minimizers, and other parameters, and accessing a local database created from archaea,  
21 402  
22 bacteria, fungi, virus, protozoa, human, and invertebrate genomes. The Kraken tool was implemented  
23 403  
24 because it is much faster than MG-RAST and allowed use of a smaller, more targeted reference  
25 404  
26 database. The results were translated (kraken-translate) and summarized (kraken-report) to provide  
27 405  
28 full taxonomic names for each classified sequence. Metagenomic analysis using One Codex was  
29 406  
30 performed by uploading the 2D FASTQ data to the One Codex platform at <https://app.onecodex.com>.  
31 407  
32 This cloud-based k-mer method was selected because it is reportedly more accurate than either the  
33 408  
34 MG-RAST or the Kraken tools and because like MG-RAST, it provides for community access to the  
35 409  
36 data and analytical results. Because of the high error rate of the R7.3 version MinION nucleotide  
37 410  
38 data, the unfiltered One Codex results were used for this analysis, which do not include an automated  
39 411  
40 error-filtering step. The One Codex read-level classification results were accessed by selecting the  
41 412  
42 “unfiltered” option in the web-based results display and downloading a data table for each sample to  
43 413  
44 generate appropriate read-level abundance information for tabulation.  
45 414  
46  
47  
48  
49

50  
51 415 Comparative data sets were generated for each of the four single species templates using full  
52  
53 length ~1500 bp Sanger sequencing of a 16S amplicons [50]. Reads from the 16S analysis were  
54 416  
55 subjected to BlastN for taxonomic assignment.  
56 417  
57  
58 418  
59  
60  
61  
62  
63  
64  
65

1  
2  
3  
4  
5  
6  
7  
8  
9  
10  
11  
12  
13  
14  
15  
16  
17  
18  
19  
20  
21  
22  
23  
24  
25  
26  
27  
28  
29  
30  
31  
32  
33  
34  
35  
36  
37  
38  
39  
40  
41  
42  
43  
44  
45  
46  
47  
48  
49  
50  
51  
52  
53  
54  
55  
56  
57  
58  
59  
60  
61  
62  
63  
64  
65

**Figure 1 Result of “What’s in my pot” analysis of a mixture with equal DNA mass from four bacterial strains.**

Rendering of real-time analysis using WIMP [20] of whole genome sequences from a synthetic mixture prepared from equal DNA quantities of four cultured microbe species (experiment “Equal <sup>(6)</sup>” in Tables 1 and 2) and run on the MinION™ sequencing platform. Arc angle is proportional to the number of reads assigned to the indicated species. Colors (scale at bottom of diagram) refer to the classification score threshold (for this analysis the threshold for inclusion was 0.01).

**Figure 2 Principal component analysis of normalized 5-mer frequency (i.e., percentage) within each MinION™ read for a mixture with equal DNA mass from four bacterial strains and a mixture with one rare component.**

A: Sequencing run with equal DNA mass from four species. B: sequencing run with three equally represented (33% DNA mass each) and one rare (1% DNA mass) species included in the DNA pool. “none”: read had no BlastN hits. “other”: read had BlastN hits but not one of the four species included in the mix.

**Figure 3 Log abundance of reads assigned from staggered mixture.**

DNA of 20 species mixed in various proportions (BEI Resources, ATCC, HM-783D, operon counts  $\mu\text{L}^{-1}$  in original mixture indicated along bottom margin of bars) was pre-amplified with  $\Phi 29$  polymerase prior to library preparation and sequenced with MinION™ R7.3 flow cells. The 2D reads that passed quality filtering were assigned to taxa using Kraken. Colored bars are species included in the mix whereas gray bars indicate species detected but not included in the original DNA mixture.

**Figure 4 Read production using a MinION™ device and an R7.3 flow cell.**

445 Illustration of reads collected from a synthetic metagenome made with equal DNA mass from  
446 four microbias species and a library prepared using SQK-MAP006 kit. Arrows indicate  
447 approximate times when additional aliquots of library and fuel were added.

#### 449 **Availability and requirements**

- 450 • Project name: Experimental Metagenome on MinION
- 451 • Project home page: <https://github.com/gigascience/paper> link will be here.
- 452 • Operating system: Unix
- 453 • Programming language: Bash and R
- 454 • Other requirements: Unix
- 455 • License: N/A

#### 457 **Availability of supporting data**

458 The datasets supporting the results of this article are available in the GigaDB repository [19],  
459 on the MG-RAST server 4629367.3, 4629445.3, 4629369.3, 4629381.3, 4614572.3,  
460 4685746.3, 4685745.3, 4705090.3, and at the European Nucleotide Archive as primary  
461 accessions PRJEB8672 and PRJEB8716. One Codex results are available at  
462 [https://app.onecodex.com/projects/bb\\_minion\\_env](https://app.onecodex.com/projects/bb_minion_env).

#### 464 **Competing interests**

465 BLB, MW, MCR, and RBF are enrolled in the Oxford Nanopore MinION™ Access  
466 Programme (MAP) and received free materials for this research. SSM is an employee of One  
467 Codex.

#### 469 **Authors' contributions**

1 470 BLB conceived of the study, performed the DNA extraction and sequencing, directed the  
2 471 data analysis, and drafted the manuscript. MW provided bioinformatic analyses and  
3  
4 472 statistical analyses. MCR participated in study design, sequence alignment, and  
5  
6  
7 473 bioinformatic analysis. RBF participated in study design, sequencing, data analysis, and  
8  
9  
10 474 manuscript preparation. SSM performed some of the bioinformatic analyses and data  
11  
12 475 interpretation. All authors read and approved the final manuscript.  
13  
14  
15 476

## 16 477 **Acknowledgements**

18  
19 478 This work was supported by the Virginia Commonwealth University Department of Biology  
20  
21  
22 479 (BLB, MCR, RBF), and by GenEco, LLC, Richmond, Virginia to BLB. Funding for MW  
23  
24 480 was from the Biotechnology and Biological Sciences Research Council including Institute  
25  
26  
27 481 Strategic Programme and National Capability grants (BBSRC; BBS/E/D/20310000,  
28  
29 482 BB/J004243/1, BB/M020037/1). The authors acknowledge M. Kensey Barker (VCU) for  
30  
31  
32 483 assistance with culturing bacteria. John Tyson (UBC) provided runtime plots and wrote the  
33  
34 484 python scripts used to control the MinION device during the run. Hugh Eaves (VCU)  
35  
36  
37 485 provided programming assistance. Sarah Highlander (Venter Inst.) provided advice on  
38  
39 486 determining DNA concentration. Michael Micorescu (ONT) provided assistance with  
40  
41  
42 487 Kraken. Arwyn Edwards and Kevin Keegan provided thorough review and suggestions for  
43  
44 488 improvement of the manuscript. The following reagent was obtained through BEI Resources,  
45  
46 489 NIAID, NIH as part of the Human Microbiome Project: Genomic DNA from Microbial  
47  
48  
49 490 Mock Community B (Staggered, Low Concentration), v5.2L, for 16S rRNA Gene  
50  
51 491 Sequencing, HM-783D.  
52

## 53 492 **List of abbreviations**

54  
55  
56 493  
57  
58 494 MAP: MinION™ Access Programme  
59  
60  
61  
62  
63  
64  
65

495 2D: refers to sequences where both the template and the complement were completed

496 (bidirectional) and passed the Metrichor quality threshold (Q9)

497 PCA: principal components analysis

498 gDNA: genomic DNA isolates from putatively pure cultures of bacterial strains

499

## 500 **References**

- 501 1. Mendoza MLZ, T Sicheritz-Ponten, MTP Gilbert. Environmental genes and genomes:  
502 understanding the differences and challenges in the approaches and software for their  
503 analyses. *Briefings in Bioinformatics*, 2015, 1–14. doi: 10.1093/bib/bbv001
- 504 2. Thomas T, Gilbert J, Meyer F. Metagenomics – a guide from sampling to data analysis. *Microb*  
505 *Inform Experim.* 2012;2:3.
- 506 3. Kasianowicz JJ, Brandin E, Branton D, Deamer DW. Characterization of individual polynucleotide  
507 molecules using a membrane channel. *Proc Natl Acad Sci.* 1996;93:13770–73.
- 508 4. Eisenstein M. Oxford Nanopore announcement sets sequencing sector abuzz. *Nat Biotechnol.*  
509 2012;30:295–6.
- 510 5. Loman NJ, Quick J, Simpson JT. A complete bacterial genome assembled de novo using only  
511 nanopore sequencing data. *Nat Methods.* 2015;12:733–5.
- 512 6. Goodwin S, Gurtowski J, Ethe-Sayers S, Deshpande P, Schatz M, McCombie WR. Oxford  
513 Nanopore sequencing and de novo assembly of a eukaryotic genome. *Genome Res.*  
514 2015a;25:1-7.
- 515 7. Risse J, Thomson M, Blakely G, Koutsovoulos G, Blaxter M, Watson M. A single chromosome  
516 assembly of *Bacteroides fragilis* strain BE1 from Illumina and MinION nanopore sequencing  
517 data. *GigaScience* 2015;4:60.

- 518 8. Quick J, Ashton P, Calus S, Chatt C, Gossain S, et al. Rapid draft sequencing and real-time  
1 nanopore sequencing in a hospital outbreak of *Salmonella*. *Genome Biol.* 2015;16:114.  
2 519  
3  
4  
5 520 9. Madoui M-A, Engelen S, Cruaud C, Belser C, Bertrand L, et al. Genome assembly using nanopore-  
6  
7 521 guided long and error-free DNA reads. *BMC Genomics.* 2015;16:327.  
8  
9  
10 522 10. Mongan AE, Yusuf I, Wahid I, Hatta M. The evaluation on molecular techniques of reverse  
11  
12 523 transcription loop-mediated isothermal amplification (RT-LAMP), reverse transcription  
13  
14 524 polymerase chain reaction (RT-PCR), and their diagnostic results on MinION™ nanopore  
15  
16 525 sequencer for the detection of dengue virus serotypes. *Am J Microbiol Res.* 2015;3:118-24.  
17  
18  
19  
20 526 11. Hargreaves AD, Mulley JF. Snake venom gland cDNA sequencing using the Oxford nanopore  
21  
22 527 MinION portable DNA sequencer. *PeerJ.* 2015 Nov 24;3:e1441. doi: 10.7717/peerj.1441.  
23  
24 528 eCollection 2015.  
25  
26  
27  
28 529 12. Bolisetty MT, Rajadinakaran G, Graveley BR. Determining exon connectivity in complex  
29  
30 530 mRNAs by nanopore sequencing. *Genome Biol.* 2015;16:204.  
31  
32  
33 531 13. Cao MD, Ganesamoorthy D, Elliott A, Zhang H, Cooper M, Coin L. Streaming algorithms for  
34  
35 532 identification of pathogens and antibiotic resistance potential from real-time MinION  
36  
37 533 sequencing. *bioRxiv* 2015; doi: <http://dx.doi.org/10.1101/019356>.  
38  
39  
40  
41 534 14. Judge K, Harris SR, Reuter S, Parkhill J, Peacock SH. Early insights into the potential of the  
42  
43 535 Oxford Nanopore MinION for the detection of antimicrobial resistance genes. *J Antimicrob*  
44  
45 536 *Chemother* 2015; doi:10.1093/jac/dkv206.  
46  
47  
48  
49 537 15. Wang J, Moore NE, Deng Y-M, Eccles DA, Hall RJ. MinION nanopore sequencing of an  
50  
51 538 influenza genome. *Front Microbiol.* 2015;6:766.  
52  
53  
54 539 16. Kilianski A, Haas JL, Corriveau EJ, Liem AT, Willis KL, et al. Bacterial and viral identification  
55  
56 540 and differentiation by amplicon sequencing on the MinION nanopore sequencer. *GigaScience*  
57  
58 541 2015;4:12.  
59  
60  
61  
62  
63  
64  
65

- 542 17. Greninger AL, Naccache SN, Federman S, Yu G, Mbala P, et al. Rapid metagenomic  
1 identification of viral pathogens in clinical samples by real-time nanopore sequencing  
2 543  
3  
4 544 analysis. *Genom Med.* 2015;7:99.  
5  
6  
7 545 18. Edwards A, Debbonaire AR, Sattler B, Mur LAJ, Hodson AJ. Extreme metagenomics using  
8  
9  
10 546 nanopore DNA sequencing: a field report from Svalbard, 78 °N. 2016. bioRxiv. doi:  
11  
12 547 <http://dx.doi.org/10.1101/073965>  
13  
14  
15 548 19. Brown, B, L; Watson, M; Minot, S, S; Rivera, M, C; Franklin, R, B (2017): Supporting data for  
16  
17 549 "MinION nanopore sequencing of environmental metagenomes: a synthetic approach"  
18  
19 550 GigaScience Database. <http://dx.doi.org/10.5524/100278>  
20  
21  
22 551 20. Watson M, Thomson M, Risse J, Talbot R, Santoyo-Lopez J, et al. poRe: an R package for the  
23  
24 552 visualization and analysis of nanopore sequencing data. *Bioinformatics.* 2015;31:114-5.  
25  
26  
27  
28 553 21. Loman NJ, Quinlan AR. Poretools: a toolkit for analyzing nanopore sequence data.  
29  
30 554 *Bioinformatics.* 2014; 30:3399–3401.  
31  
32  
33 555 22. Leggett RM, Heavens D, Caccamo M, et al.: NanoOK: Multi-reference alignment analysis of  
34  
35 556 nanopore sequencing data, quality, and error profiles. *Bioinformatics.* 2015;32:142-4.  
36  
37  
38  
39 557 23. Meyer F, Paarmann D, D'Souza M, Olson R, Glass EM, et al. The metagenomics RAST server –  
40  
41 558 a public resource for the automatic phylogenetic and functional analysis of metagenomes.  
42  
43 559 *BMC Bioinfo.* 2008;9:386.  
44  
45  
46 560 24. Juul S, Izquierdo F, Hurst A, Dai X, Wright A, Kulesha E, Pettett R, Turner D. What's in my pot?  
47  
48 561 Real-time species identification on the MinION™. bioRxiv. 2015; doi:  
49  
50 562 <http://dx.doi.org/10.1101/030742>.  
51  
52  
53  
54 563 25. Wood DE, Salzberg SL. Kraken: ultrafast metagenomic sequence classification using exact  
55  
56 564 alignments. *Genome Biol.* 2014;15:R46.  
57  
58  
59  
60  
61  
62  
63  
64  
65

- 565 26. Minot SS, Krumm N, Greenfield NB. One Codex: a sensitive and accurate data platform for  
1 genomic microbial identification. bioRxiv. 2015. doi: <http://dx.doi.org/10.1101/027607>  
2 566  
3  
4
- 5 567 27. Altschul SF, Madden TL, Schaffer AA, Zhang J, Zhang Z, Miller W, Lipman DJ. Gapped BLAST  
6 and PSI-BLAST: a new generation of protein database search programs. Nucl Acids Res.  
7 568  
8 1997;25:3389.  
9 569
- 10 570 28. R Core Team. R: A language and environment for statistical computing. R Foundation for  
11 Statistical Computing, Vienna, Austria. 2015;<https://www.R-project.org/>.  
12 571  
13  
14
- 15 572 29. Park H-D, Sasaki Y, Maruyama T, Yanagisawa E, Hiraishi A, Kato K. Degradation of the  
16 cyanobacterial hepatotoxin microcystin by a new bacterium isolated from a hypertrophic lake.  
17 573  
18 Environ Toxicol 2001;16:337-43.  
19 574
- 20 575 30. Jones MB, Highlander SK, Anderson EL, Li W, Dayrit M, et al. Library preparation methodology  
21 can influence genomic and functional predictions in human microbiome research. Proc Nat  
22 576  
23 Acad Sci. 2015;45:14024-9.  
24 577  
25  
26
- 27 578 31. Wommack KE, Bhavsar J, Ravel J. Metagenomics: Read Length Matters. Appl Environ  
28 579  
29 Microbiol. 2008;74:1453.  
30  
31  
32
- 33 580 32. Brown BL, LePrell RV, Franklin RB, Rivera MC, Cabral FC, et al. Metagenomic analysis of  
34 planktonic microbial consortia from a non-tidal urban-impacted segment of James River.  
35 581  
36 Stand Genomic Sci. 2015;10:65.  
37 582  
38  
39
- 40 583 33. Magasin JD, Gerloff DL. Pooled assembly of marine metagenomic datasets: enriching annotation  
41 584  
42 through chimerism. Bioinformatics. 2015;31:311-317.  
43 585  
44  
45
- 46 586 34. Freitas TAK, Li P-E, Scholz MB, Chain PSG. Accurate read-based metagenome characterization  
47 using a hierarchical suite of unique signatures. Nucl Acids Res. 2015; doi:  
48 587  
49 10.1093/nar/gkv180.  
50  
51  
52  
53  
54  
55  
56  
57  
58  
59  
60  
61  
62  
63  
64  
65



- 588 35. Zhang Q, Ye Y, Doak TG. Artificial functional difference between microbial communities caused  
1  
2 589 by length difference of sequencing reads. *Biocomputing* 2012;259-270. DOI:  
3  
4 590 [http://dx.doi.org/10.1142/9789814366496\\_0025](http://dx.doi.org/10.1142/9789814366496_0025).  
5  
6
- 7 591 36. Frank JA, Pan Y, Tooming-Klunderud A, Eijsink VGH, McHardy AC, Nederbragt AJ, Pope PB.  
8  
9 592 Improved metagenome assemblies and taxonomic binning using long-read circular consensus  
10  
11 593 sequence data. *Sci Rep.* 2016;6:25373 doi:10.1038/srep25373.  
12  
13  
14
- 15 594 37. Sović I, Šikić M, Wilm A, Fenlon SN, Chen S, Nagarajan N. Fast and sensitive mapping of  
16  
17 595 nanopore sequencing reads with GraphMap. *Nat Comm.* 2016;11307.  
18  
19 596 doi:10.1038/ncomms11307 doi:10.1038/ncomms11307.  
20  
21
- 22 597 38. Chaisson MJ, Tesler G. Mapping single molecule sequencing reads using basic local alignment  
23  
24 598 with successive refinement (BLASR): application and theory. *BMC Bioinfo.* 2012;13:238  
25  
26 599 doi: 10.1186/1471-2105-13-238.  
27  
28  
29
- 30 600 39. Hugh R. Note: *Pseudomonas maltophilia* sp. nov., nom. rev. *Int J System Evol Microbiol.*  
31  
32 601 1981;31:195. doi: 10.1099/00207713-31-2-195  
33  
34
- 35 602 40. Binga EK, Lasken RS, Neufeld JD. Something from (almost) nothing: the impact of multiple  
36  
37 603 displacement amplification on microbial ecology. *The ISME Journal.* 2008;2:233-241.  
38  
39  
40
- 41 604 41. Lasken RS, Stockwell TB. (2007). Mechanism of chimera formation during the Multiple  
42  
43 605 Displacement Amplification reaction. *BMC Biotechnol* 7: 19. doi:10.1186/1472-6750-7-19  
44  
45
- 46 606 42. Li C, Chng KR, Boey EJH, Ng AHQ, Wilm A, Nagarajan N. INC-Seq: accurate single molecule  
47  
48 607 reads using nanopore sequencing. *GigaScience.* 2016;5:34.  
49  
50
- 51 608 43. Benítez-Páez A, Portune KJ, Sanz Y. Species-level resolution of 16S rRNA gene amplicons  
52  
53 609 sequenced through the MinION™ portable nanopore sequencer. *GigaScience.* 2016;5:4.  
54  
55  
56  
57  
58  
59  
60  
61  
62  
63  
64  
65

610 44. Goodwin S, Gurtowski J, Ethe-Sayers S, Deshpande P, Schatz M, McCombie WR. Oxford  
1  
2 611 Nanopore sequencing, hybrid error correction, and *de novo* assembly of a eukaryotic genome.  
3  
4 612 Genome Res. 2015b;25:1750-6.  
5  
6  
7 613 45. Karlsson E, Lärkeryd A, Sjödin A, Forsman M, Stenberg P. Scaffolding of a bacterial genome  
8  
9 614 using MinION nanopore sequencing. Scientif Rep 2015;5:11996.  
10  
11  
12 615 46. Stephens ZD, Lee SY, Faghri F, Campbell RH, Zhai C, et al. Big data: astronomical or  
13  
14 616 genomics? PLoS Biol. 2015;13:e1002195. doi:10.1371/journal.pbio.1002195.  
15  
16  
17 617 47. Garmendia C, Bernad A, Esteban JA, Blanco L, Salas M. The bacteriophage phi 29 DNA  
18  
19 618 polymerase, a proofreading enzyme. J Biol Chem. 1992;267: 2594-2599.  
20  
21  
22 619 48. Ip CLC, Loose M, Tyson JR, Cesare M, Brown BL, et al. MinION Analysis and Reference  
23  
24 620 Consortium: Phase 1 data release and analysis. F1000Research 2015;4:1075.  
25  
26  
27 621 49. Kent WJ. BLAT—the BLAST-like alignment tool. Genome Res. 2002;12:656–64.  
28  
29  
30 622 50. Bartram AK, Lynch MD, Stearns JC, Moreno-Hagelsieb G, Neufeld JD. Generation of  
31  
32 623 multimillion-sequence 16S rRNA gene libraries from complex microbial communities by  
33  
34 624 assembling paired-end Illumina reads. Appl Environ Micro. 2011;77:3846–52.  
35  
36  
37  
38  
39  
40  
41  
42  
43  
44  
45  
46  
47  
48  
49  
50  
51  
52  
53  
54  
55  
56  
57  
58  
59  
60  
61  
62  
63  
64  
65

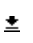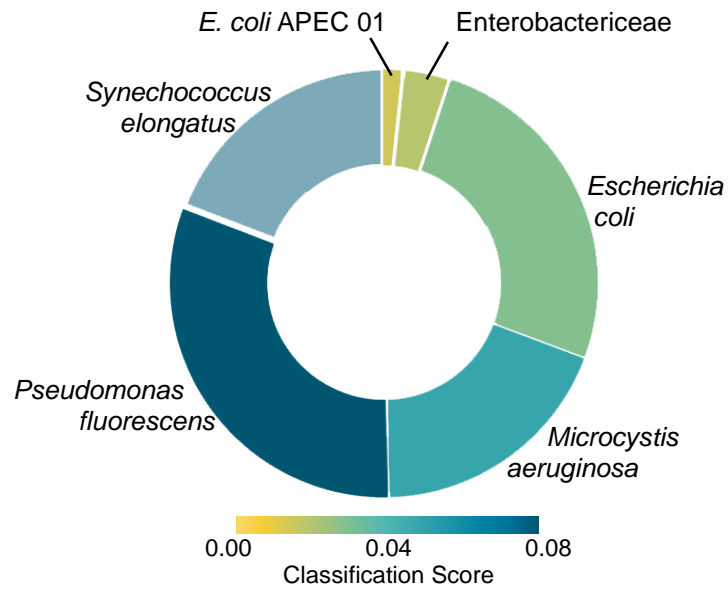

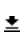

A

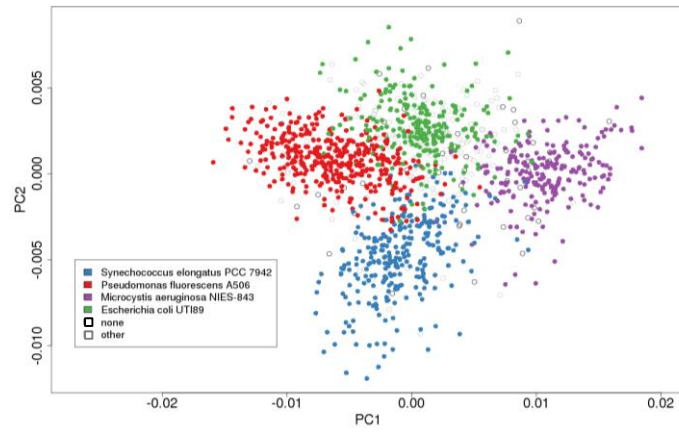

B

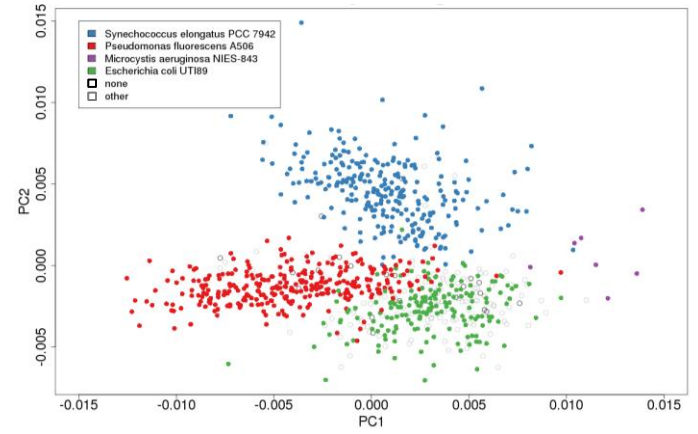

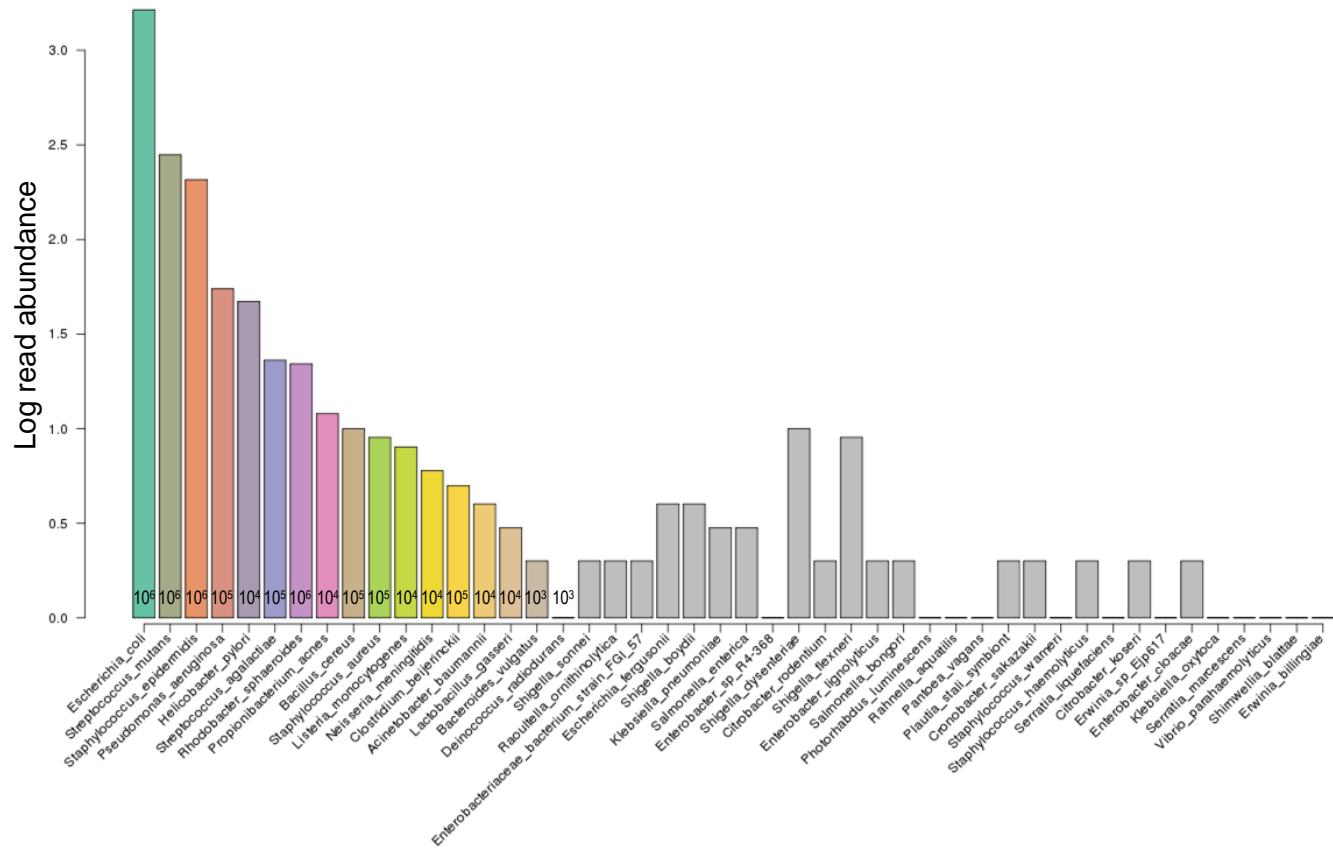

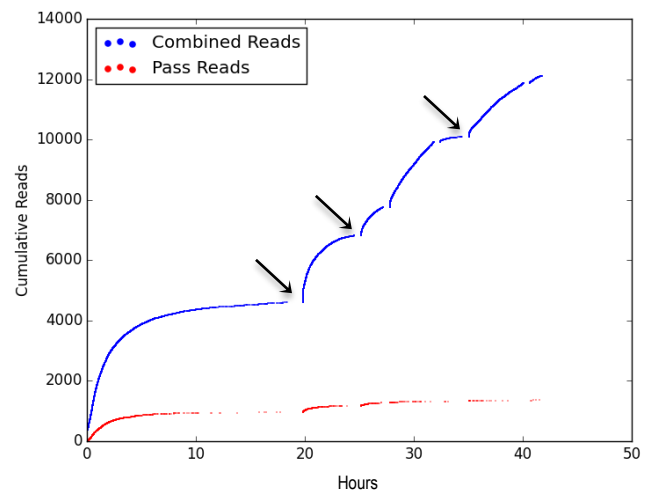

Supplement: gix007_GIGA-D-16-00081_Revision_2.pdf [file gix007_GIGA-D-16-00081_Revision_2.pdf]
