# Supplementary material for: MinION™ nanopore sequencing of environmental metagenomes: a synthetic approach
Source: PubMed Central journal article supplement (PMC5467020; doi:10.1093/gigascience/gix007), 2017-02-24
Supplement: gix007_GIGA-D-16-00081_Original_Submission.pdf [file gix007_GIGA-D-16-00081_Original_Submission.pdf]

[Click here to view linked References](#)

1 **MinION™ nanopore sequencing of environmental metagenomes: a synthetic approach**

1  
2  
3  
4  
5  
6  
7  
8  
9  
10  
11  
12  
13  
14  
15  
16  
17  
18  
19  
20  
21  
22  
23  
24  
25  
26  
27  
28  
29  
30  
31  
32  
33  
34  
35  
36  
37  
38  
39  
40  
41  
42  
43  
44  
45  
46  
47  
48  
49  
50  
51  
52  
53  
54  
55  
56  
57  
58  
59  
60  
61  
62  
63  
64  
65

2  
3 Bonnie L. Brown, Virginia Commonwealth University, Department of Biology, 1000 W Cary Street,

4 Richmond, VA 23284, USA, [blbrown@vcu.edu](mailto:blbrown@vcu.edu)

5 Mick Watson, The Roslin Institute, University of Edinburgh, Division of Genetics and Genomics,  
6 Easter Bush, Midlothian, EH25 9RG, UK, [mick.watson@roslin.ed.ac.uk](mailto:mick.watson@roslin.ed.ac.uk)

7 Kevin P. Keegan, Argonne National Laboratory, Biosciences Division, 9700 South Cass Avenue,  
8 Argonne, IL 60439, USA, [kkeegan@anl.gov](mailto:kkeegan@anl.gov)

9 Maria C. Rivera, Virginia Commonwealth University, Department of Biology, 1000 W Cary Street,  
10 Richmond, Virginia 23284, USA, [mcrivera@vcu.edu](mailto:mcrivera@vcu.edu)

11 Rima B. Franklin, Virginia Commonwealth University, Department of Biology, 1000 W Cary Street,  
12 Richmond, Virginia 23284, USA, [rbfranklin@vcu.edu](mailto:rbfranklin@vcu.edu)

13  
14 **Corresponding author:** Bonnie L. Brown, [blbrown@vcu.edu](mailto:blbrown@vcu.edu)

29 **Abstract**

30 **Background:** Environmental metagenomics is typically accomplished by annotating WGS  
31 sequences or assigning taxonomy based on 16S amplicon sequences. Both of these approaches  
32 provide species annotations that are limited by read length. A nanopore-based sequencing  
33 platform, MinION™, produces reads that are  $\geq 1 \times 10^4$  bp in length, potentially providing for more  
34 precise assignment of taxa, thereby alleviating some of the error inherent in determining  
35 metagenome composition from short reads. We tested the ability of sequence data produced by  
36 MinION (R7.3 flow cells) to correctly classify prokaryotes in single-species runs and in three  
37 types of simple mixed synthetic communities: a mixture of DNA using equal quantities from four  
38 species, a community with one relatively rare (1%) and three common (33% each) components,  
39 and a community with 20 species of staggered representation. Community analysis was  
40 performed by three methods: BlastN, Kraken, and MG-RAST.

41  
42 **Results:** MinION long reads for single-species runs (R7.3 flow cells) yielded as few as 224 to as  
43 many as 3,497 bidirectional high-quality (2D) reads with an average overall study length of 6,000  
44 bp. For the single-species analyses, assignment of reads to the correct genus ranged from 25% to  
45 95%, and the majority of mis-assigned reads were to related organisms. The synthetic  
46 metagenome yielded 714 high quality 2D reads of approximately 5,500 bp that were 88%  
47 correctly assigned. Synthetic metagenomes run using the MinION Mk1 device (R7.3 flow cells)  
48 yielded 899-3,497 2D reads with lengths averaging 5,700 bp; the best assignment being 97%  
49 correct. Community proportions for “equal” and “rare” synthetic libraries were close to the  
50 known proportions, deviating from 0.1 – 10% across all tests. For a 20-species mock community  
51 with staggered contributions, a sequencing run detected all but 3 species (each included at  
52  $< 0.05\%$  of DNA in the total mixture); 71% of reads were assigned to the correct species, 75% of  
53 reads were assigned to the correct genus, and  $> 99\%$  of reads were assigned to the correct family.

54  
55 **Conclusions:** At the present high quality output level (just under  $4 \times 10^3$  2D pass reads for an  
56 environmental metagenome), MinION sequencing followed by Kraken analysis has the potential

57 to provide rapid and accurate metagenomic analysis where the environmental consortium is  
1  
2 58 comprised of a limited number of taxa. Important considerations noted in this study are that the  
3  
4 59 MinION platform is very sensitive to DNA quality, variation is high across libraries and flow  
5  
6 60 cells, the relatively small numbers of 2D reads per analysis limit metagenomic analysis where  
7  
8  
9 61 thousands of taxa are expected, and these same qualities limit detection of very rare components  
10  
11 62 of microbial consortia. Nevertheless, the fact that >97% of high quality reads generated by  
12  
13 63 MinION can be confidently assigned to expected taxa and in most cases mirror the known  
14  
15 64 proportions in a mixture warrants further exploration of practical application to environmental  
16  
17 65 metagenomics as the platform continues to develop and improve. With advances in throughput  
18  
19 66 and error rate, this platform shows great promise for precise real-time analysis of both the  
20  
21 67 components and the relative representation of more complex communities, free from  
22  
23  
24 68 amplification biases introduced by PCR-based metagenomic analyses.  
25

26 69

27  
28 70 **Keywords**

29  
30 71 MinION™, Oxford Nanopore Technologies, metagenome, whole-genome sequencing, long-read  
31  
32 72 sequencing  
33  
34

35 73

36  
37 74

38  
39 75

40  
41 76

42  
43 77

44  
45 78

46  
47 79

48  
49 80

50  
51 81

52  
53 82

54  
55 83

56  
57 84

58  
59  
60  
61  
62  
63  
64  
65

## 85 **Background**

1  
2 86 Environmental metagenomics employs molecular genetic markers to identify ecologically and  
3  
4 87 epidemiologically important components of sediments, soils, waters, and surfaces. Knowledge of the  
5  
6 88 consortia that inhabit these ecosystems allows for better understanding of the organisms and their  
7  
8 89 ecological roles, provides for creation of effective strategies to mitigate ecosystem damage, and  
9  
10 90 allows evaluation of the responses of species to environmental change. One common sequencing  
11  
12 91 approach in environmental metagenomics involves sequencing and subsequent annotation of whole  
13  
14 92 genome nucleic acid fragments (WGS) extracted directly from water or sediment to discover major  
15  
16 93 components of the ecosystem; if sequenced deeply enough, rare species can be detected. For well-  
17  
18 94 studied components of the microbial community, such metagenomic data also can be used to  
19  
20 95 characterize the functional potential of complex communities.  
21  
22  
23

24 96 One approach to analyzing a set of WGS sequences is to assemble them into large contigs prior to  
25  
26 97 analysis and annotation. If assembled correctly, contigs have a greater chance of identifying the true  
27  
28 98 components; however, when assembling contigs from a community of related species, there is a high  
29  
30 99 likelihood of generating chimeric contigs. If WGS reads are not assembled, there is no chance of  
31  
32 100 chimeras and more true diversity can potentially be uncovered through annotation, but very short  
33  
34 101 reads can lack the information needed to properly identify the source of the read due to conservation  
35  
36 102 of gene sequence across related organisms. The high information content of very long reads such as  
37  
38 103 those provided by MinION™ (Oxford Nanopore Technologies, Inc., Oxford, UK) has the potential to  
39  
40 104 overcome some of the limitations of short reads by allowing for longer alignments that potentially can  
41  
42 105 contribute to higher taxonomic specificity and resolution. Although conceived almost two decades  
43  
44 106 ago [1], nanopore-based whole-molecule sequencing has only recently become available to  
45  
46 107 MinION™ Access Programme (MAP) participants for exploration and practical application [2]. Data  
47  
48 108 generated by early access MinION™ flow cells have been assessed for whole genome sequencing [3,  
49  
50 109 4, 5, 6, 7], gene expression and transcriptome studies [8, 9, 10], clinical applications such as antibiotic  
51  
52 110 resistance, influenza, and Ebola [11, 12, 13], and bacterial and viral serotyping [14]. One study has  
53  
54 111 evaluated the potential of this new sequencing platform to address clinical metagenomes of viral  
55  
56 112 pathogens [15]; however, the MinION has not to date been evaluated for the potential characterization  
57  
58  
59  
60  
61  
62  
63  
64  
65

113 of environmental metagenomes. To demonstrate the potential of this platform for broader  
114 applications, we performed a set of experiments to quantify the ability of MinION™ long-read  
115 sequence data to accurately determine the structure of metagenomes by assessing its performance in  
116 identifying the taxonomy and relative proportions of the organisms in synthetic metagenomes.

## 118 **Data description**

119 The raw MinION data [16] collected during sequencing by MinKNOW software (versions 0.49.2.9  
120 through 0.51.3.40 b201605171140) were immediately uploaded as FAST5 packets to Metrichor  
121 Agent (r7.3 2D basecalling, ver rx-2.22-44717-dg-1.6.1-ch-1.6.3; Mk1 2D basecalling, ver WIMP  
122 Bacteria k24 for SQK-MAP006), after which base-called data [16] were returned to the host  
123 computer, also in the form of FAST5 files. The programs poRe [17], Poretools [18], and NanoOK  
124 [19] were used to extract and characterize the numbers of reads and channels, archive only the 2D  
125 reads into a FASTQ and FASTA files for downstream analyses. The basecalled data sets were  
126 scrutinized by methods commonly employed in metagenome analysis including WIMP [20], BlastN  
127 [21] versus a database of all bacteria, Kraken [22] which indexed more than 5000 genomes and  
128 plasmids, MG-RAST [23] which assigned taxa based on predicted proteins and rRNA genes, and  
129 principal components analysis based on the frequency of 5-mers in each read then annotated with the  
130 top BlastN hit, and this was carried out in R [24].

## 132 **Results**

133 MinION™ WGS libraries were generated from 1 µg of fresh DNA isolates (see Methods) of  
134 laboratory cultures of two Proteobacteria, *Escherichia coli* and *Pseudomonas fluorescens*, and two  
135 Cyanobacteria, *Microcystis aeruginosa*, and *Synechococcus elongatus*, and from mixtures of these  
136 four species (either equivalent amounts of DNA or using three common and one rare species),  
137 yielding sufficient Pre-sequencing Mix for multiple loads of each flow cell. An additional library  
138 prepared from a commercially prepared 20-species mock community required genome pre-

139 amplification using  $\Phi$ 29 polymerase to generate sufficient material to prepare the sequencing library  
140 because only 100 ng of material are provided by the supplier of this product.

141 The single-species runs generated up to  $22 \times 10^3$  reads ( $0.2\text{--}1.1 \times 10^3$  2D reads) ranging from as  
142 short as 5 bp to as long as  $267 \times 10^3$  bp (Table 1), of which  $\geq 90\%$  of assignments for the high quality  
143 2D reads for *E. coli*, *P. fluorescens*, and *S. elongatus* concurred with the known species (Table 2).  
144 For *M. aeruginosa*, at best 58% of 2D reads were correctly assigned to the level of species, although  
145 many of the mis-assigned reads aligned to closely related cyanobacteria genera, Sphingobacteriaceae,  
146 and other prokaryotes known to break down microcystin [25]. Comparative 16S analysis of the  
147 various preparations used to construct the synthetic communities confirmed identity of the former  
148 three strains, whereas for the latter strain *M. aeruginosa*, the 16S analysis indicated 90% similarity to  
149 *M. aeruginosa* and *M. panniformis* (Table 3).

150 In the second round of validation, using three synthetic communities containing mixtures of the  
151 same afore-described species,  $6\text{--}12 \times 10^3$  reads ( $0.7\text{--}1.3 \times 10^3$  2D reads) were generated per run,  
152 ranging in length from  $0.6\text{--}56.8 \times 10^3$  bp (Table 1). For the two communities comprised of equal DNA  
153 contribution from four eubacteria (25% each species), WGS proportions aligned roughly but not  
154 exactly with the known proportions (Table 2). In the early run (MinION with R7.3 flow cell)  
155 specifically, classification results were 27% *E. coli*, 16% *M. aeruginosa*, 30% *P. fluorescens*, 21% *S.*  
156 *elongatus*, 3% Enterobacteriaceae, and 3% misclassified. In the subsequent test (Mk1 with R7.3 flow  
157 cell), classification results were 26% *E. coli*, 18% *M. aeruginosa*, 30% *P. fluorescens*, 22% *S.*  
158 *elongatus*, and 3% Enterobacteriaceae, and 1% misclassified (Figure 1). For the community with  
159 three common (33% of each) and one rare (1%) representative, classifications were 33% *E. coli*, 34%  
160 *P. fluorescens*, 29% *S. elongatus*, 1% *M. aeruginosa*, 2% misclassified (a third of those latter category  
161 of reads were assigned to *Shigella*). Read annotation of 5-mers for both the “Equal” and “Rare”  
162 community data sets using the top BlastN hit for each read revealed that 5-mer frequency profiles of  
163 MinION long-read sequences were shared within species. This was reflected in the 5-mer frequency  
164 analysis which revealed distinct clusters in the PCA (Figure 2).

165 In the final round of testing, the mock microbial community with 20 species included in  
166 “staggered” proportions (i.e., 1,000 to 1,000,000 16S rRNA operon copies per organism per  $\mu\text{L}$  of  
167 material supplied) yielded  $14.7 \times 10^3$  reads ( $3.5 \times 10^3$  2D reads) ranging in length from 0.5- $20.9 \times 10^3$  bp,  
168 sufficient to detect all of the high and moderate species, but the sequencing run failed to detect 3 of 5  
169 species that were included at very low rRNA operon copy number (Table 4). For that run, 25% of  
170 reads were to Enterobacteriaceae and misclassifications accounted for only 0.2% of read  
171 assignments. Greatly overrepresented in the results for this run were reads assigned to *E. coli*  
172 (included as 20% of DNA but observed as 46% of read assignments), whereas greatly  
173 underrepresented in the results were reads assigned to *R. sphaeroides* which was included as 41% of  
174 DNA but accounted for only 1% of read assignments (Figure 3).

191 **Table 1 MinION™ sequencing output details for single-species and synthetic mixtures.**

| Experiment (chemistry)                                                        | Pores with reads | Run time (hr) | Total bp (Gbp) | Total Reads | Number of 2D reads | Mean 2D read length (bp) | MG-RAST Accession |
|-------------------------------------------------------------------------------|------------------|---------------|----------------|-------------|--------------------|--------------------------|-------------------|
| <i>E. coli</i> (5)                                                            | 430              | 42            | 83.6           | 26590       | 1112               | 5274                     | 4629367.3         |
| <i>P. fluorescens</i> (5)                                                     | 453              | 48            | 119.4          | 25228       | 777                | 7784                     | 4629445.3         |
| <i>M. aeruginosa</i> (5)                                                      | 377              | 18            | 40.8           | 22760       | 569                | 5676                     | 4629369.3         |
| <i>S. elongatus</i> (5)                                                       | 367              | 23            | 18.3           | 6163        | 224                | 5101                     | 4629381.3         |
| Equal mixture (25% of each of four species)                                   |                  |               |                |             |                    |                          |                   |
| (5)                                                                           | 129              | 24            | 26.5           | 10592       | 714                | 5527                     | 4614572.3         |
| (6)                                                                           | 437              | 44            | 77.1           | 12174       | 1358               | 5202                     | 4685746.3         |
| Rare mixture (1% of <i>M. aeruginosa</i> and 33% each of three other species) |                  |               |                |             |                    |                          |                   |
| (6)                                                                           | 449              | 18            | 39.0           | 6728        | 899                | 6194                     | 4685745.3         |
| Staggered mixture (20 species in various proportions)                         |                  |               |                |             |                    |                          |                   |
| (6)                                                                           | 300              | 33            | 39.0           | 14711       | 3497               | 2612                     | 4705090.3         |

192 The four single species were sequenced using the original MinION device with SQK–  
 193 MAP005 chemistry: indicated by (5). The equal mixture was sequenced using both the original  
 194 MinION device with SQK–MAP005 chemistry and the Mk1 (SQK–MAP006 chemistry:  
 195 indicated by (6)). Columns relating to 2D indicate bi-directional reads with quality above Q9.

196  
197  
198  
199  
200  
201  
202  
203  
204  
205  
206

1  
2  
3  
4  
5  
6  
7  
8  
9  
10  
11  
12  
13  
14  
15  
16  
17  
18  
19  
20  
21  
22  
23  
24  
25  
26  
27  
28  
29  
30  
31  
32  
33  
34  
35  
36  
37  
38  
39  
40  
41  
42  
43  
44  
45  
46  
47  
48  
49  
50  
51  
52  
53  
54  
55  
56  
57  
58  
59  
60  
61  
62  
63  
64  
65



207 **Table 2 Assignment of metagenomic reads based on three analyses.**

| Experiment                                                                | BLASTN            |                  |      | KRAKEN            |      |      | MG-RAST           |                   |      |
|---------------------------------------------------------------------------|-------------------|------------------|------|-------------------|------|------|-------------------|-------------------|------|
|                                                                           | Known             | Mis              | Un   | Known             | Mis  | Un   | Known             | Mis               | Un   |
| <i>E. coli</i>                                                            | 95.0              | 4.2              | 0.8  | 90.9 <sup>a</sup> | 0.5  | 1.7  | 50.3 <sup>a</sup> | 31.0 <sup>b</sup> | 18.3 |
| <i>P. fluorescens</i>                                                     | 79.3              | 16.6             | 4.1  | 79.3              | 15.2 | 5.5  | 79.5              | 19.6              | 0.9  |
| <i>S. elongatus</i>                                                       | 82.8              | 2.4              | 14.8 | 91.5              | 1.8  | 6.7  | 85.9              | 12.6              | 1.5  |
| <i>M. aeruginosa</i>                                                      | 24.8              | 7.4              | 67.8 | 45.0              | 8.9  | 46.1 | 58.4 <sup>a</sup> | 35.0              | 5.5  |
| Equal mixture (25% each of four spp)                                      |                   |                  |      |                   |      |      |                   |                   |      |
| (5)                                                                       | 88.2 <sup>a</sup> | 4.6              | 7.1  | 76.1              | 11.6 | 12.3 | 61.4              | 38.5 <sup>c</sup> | 0.1  |
| (6)                                                                       | 93.5 <sup>a</sup> | 2.7              | 3.7  | 95.4              | 2.0  | 2.6  | 77.1              | 22.6 <sup>b</sup> | 0.3  |
| Rare mixture (1% of <i>M. aeruginosa</i> and 33% each of three other spp) |                   |                  |      |                   |      |      |                   |                   |      |
| (6)                                                                       | 96.6              | 1.0              | 2.4  | 95.2              | 0.9  | 3.9  | 79.6              | 20.2 <sup>b</sup> | 0.2  |
| Staggered mixture (20 species in various proportions)                     |                   |                  |      |                   |      |      |                   |                   |      |
| (6)                                                                       | 92.1              | 3.6 <sup>b</sup> | 4.3  | 89.3              | 1.9  | 8.8  | 54.1              | 28.8 <sup>b</sup> | 17.1 |

208 Percent of 2D reads assigned to the known genus (Known), assigned to another genus (Mis),  
 209 and unclassified at the level of genus (Un) for single-species DNA preparations (all run using  
 210 the original MinION™ platform) and synthetic mixtures sequenced on the MinION and  
 211 analyzed by MG-RAST, Kraken, and BlastN. <sup>a</sup>In some cases, reads were classified only to a  
 212 higher (correct) taxonomic level than genus, resulting in totals < 100% for various analyses.

213 <sup>b</sup>Mostly *Shigella*. <sup>c</sup>Mostly *Stentrophomonas* and *Shigella*.

1  
2  
3  
4  
5  
6  
7  
8  
9  
10  
11  
12  
13  
14  
15  
16  
17  
18  
19  
20  
21  
22  
23  
24  
25  
26  
27  
28  
29  
30  
31  
32  
33  
34  
35  
36  
37  
38  
39  
40  
41  
42  
43  
44  
45  
46  
47  
48  
49  
50  
51  
52  
53  
54  
55  
56  
57  
58  
59  
60  
61  
62  
63  
64  
65

223 **Table 3 Breakdown of BlastN assignment of 16S reads for single-species DNA**  
 224 **preparations used in this study.**

| Culture                        | Final<br>sequence<br>Length<br>(bp) | %  | Sequence matches in BlastN<br>Organism                                                |
|--------------------------------|-------------------------------------|----|---------------------------------------------------------------------------------------|
| <i>Escherichia coli</i>        | 1440                                | 97 | <i>E. coli</i> numerous strains                                                       |
| <i>Escherichia coli</i>        | 1696                                | 99 | <i>E. coli</i> numerous strains                                                       |
| <i>Escherichia coli</i>        | 1604                                | 99 | <i>E. coli</i> numerous strains                                                       |
| <i>Microcystis aeruginosa</i>  | 1418                                | 90 | <i>M. aeruginosa</i> NIES-843 and NIEHS-2549,<br>and <i>M. panniformis</i> FACHB-1757 |
| <i>Pseudomonas fluorescens</i> | 1570                                | 96 | <i>P. fluorescens</i> A506 and LBUM223                                                |
| <i>Pseudomonas fluorescens</i> | 1386                                | 96 | <i>P. fluorescens</i> A506 and LBUM223                                                |
| <i>Synechococcus elongatus</i> | 1719                                | 99 | <i>S. elongatus</i> PCC 7942, PCC 6301, UTEX 2973                                     |
| <i>Synechococcus elongatus</i> | 1640                                | 99 | <i>S. elongatus</i> PCC 7942, PCC 6301, UTEX 2973                                     |
| <i>Synechococcus elongatus</i> | 1642                                | 99 | <i>S. elongatus</i> PCC 7942, PCC 6301, UTEX 2973                                     |
| <i>Synechococcus elongatus</i> | 1431                                | 99 | <i>S. elongatus</i> PCC 7942, PCC 6301, UTEX 2973                                     |
| <i>Synechococcus elongatus</i> | 1583                                | 99 | <i>S. elongatus</i> PCC 7942, PCC 6301, UTEX 2973                                     |

226

227

228

229

230

231

232

233

234

235

236

1  
2  
3  
4  
5  
6  
7  
8  
9  
10  
11  
12  
13  
14  
15  
16  
17  
18  
19  
20  
21  
22  
23  
24  
25  
26  
27  
28  
29  
30  
31  
32  
33  
34  
35  
36  
37  
38  
39  
40  
41  
42  
43  
44  
45  
46  
47  
48  
49  
50  
51  
52  
53  
54  
55  
56  
57  
58  
59  
60  
61  
62  
63  
64  
65

237 **Table 4 Known and estimated composition of 20-species mock staggered community.**

238

| Organism                          | Operon count/ $\mu\text{L}$ | Quantity pg/ $\mu\text{L}$ | % DNA in template | WIMP % species     | WIMP % Genus       |
|-----------------------------------|-----------------------------|----------------------------|-------------------|--------------------|--------------------|
| <i>Acinetobacter baumannii</i>    | 10,000                      | 8.2                        | 0.24              | 0.14               | 0.14               |
| <i>Actinomyces odontolyticus</i>  | 1,000                       | 1.0                        | 0.03              | nd                 | nd                 |
| <i>Bacillus cereus</i>            | 100,000                     | 45                         | 1.33              | 0.53               | 0.53               |
| <i>Bacteroides vulgatus</i>       | 1,000                       | 0.8                        | 0.02              | 0.10               | 0.10               |
| <i>Clostridium beijerinckii</i>   | 100,000                     | 44                         | 1.30              | 0.19               | 0.19               |
| <i>Deinococcus radiodurans</i>    | 1,000                       | 1.0                        | 0.03              | 0.05               | 0.05               |
| <i>Enterococcus faecalis</i>      | 1,000                       | 0.7                        | 0.02              | nd                 | nd                 |
| <i>Escherichia coli</i>           | 1,000,000                   | 680.0                      | 20.04             | 45.61              | 45.66              |
| <i>Helicobacter pylori</i>        | 10,000                      | 8.6                        | 0.25              | 1.68               | 1.68               |
| <i>Lactobacillus gasseri</i>      | 10,000                      | 3.2                        | 0.09              | 0.14               | 0.14               |
| <i>Listeria monocytogenes</i>     | 10,000                      | 5.0                        | 0.15              | 0.38               | 0.38               |
| <i>Neisseria meningitides</i>     | 10,000                      | 5.8                        | 0.17              | 0.24               | 0.24               |
| <i>Propionibacterium acnes</i>    | 10,000                      | 8.8                        | 0.26              | 0.48               | 0.48               |
| <i>Pseudomonas aeruginosa</i>     | 100,000                     | 160.0                      | 4.71              | 1.25               | 1.25               |
| <i>Rhodobacter sphaeroides</i>    | 1,000,000                   | 1,400.0                    | 41.25             | 1.01               | 1.01               |
| <i>Staphylococcus aureus</i>      | 100,000                     | 59.0                       | 1.74              | 0.38               | 3.88               |
| <i>Staphylococcus epidermidis</i> | 1,000,000                   | 510.0                      | 15.03             | 7.67               | 7.72               |
| <i>Streptococcus agalactiae</i>   | 100,000                     | 32.0                       | 0.94              | 0.96               | 1.01               |
| <i>Streptococcus mutans</i>       | 1,000,000                   | 420.0                      | 12.38             | 10.17              | 10.17              |
| <i>Streptococcus pneumoniae</i>   | 1,000                       | 0.6                        | 0.02              | nd                 | nd                 |
| Other <sup>a,b</sup>              |                             | 0.0                        | 0.00              | 29.02 <sup>a</sup> | 25.37 <sup>b</sup> |
| Correct assignments               |                             |                            |                   | 70.98              | 74.63              |

239 Prokaryote DNA included in the 20-species mock staggered community (obtained from bei

240 Resources, ATCC, HM-783D, provided at 5.5 ng/ $\mu\text{L}$ , pre-amplified with  $\Phi\text{29}$  polymerase

241 prior to MinION™ sequencing) compared with WIMP analysis result. “nd”: not detected.

242 <sup>a</sup>Of these, 12.7% were correctly assigned to genus, 86.4% were Enterobacteriaceae, and only

243 0.7% were misclassifications. <sup>b</sup>Of these, 86.4% were Enterobacteriaceae and only 0.7% were

244 misclassified.

245

246

## 247 Discussion

1  
2 248 Sequencing of whole genome preparations can enhance environmental metagenomic analysis by  
3  
4 249 providing more precise identification of species diversity [26, 27]. Typical environmental samples  
5  
6 250 contain tens of thousands to millions of organisms, yet the resulting metagenomes almost certainly  
7  
8 251 underrepresent this diversity, and often due to short-read strategy, the resulting data sets can be  
9  
10 252 confidently assigned only to higher taxonomic levels [28, 29]. One strategy to alleviate this problem  
11  
12 253 is to carefully assemble metagenomic data, which despite the resulting chimerism has been shown to  
13  
14 254 greatly enhance species call correctness [30]. However, even with enhanced sequencing and  
15  
16 255 bioinformatic strategies, many public database accessions contain extra-species sequences, e.g.,  
17  
18 256 symbionts, parasites, pathogens, and sequencing linkers/primers/adapters (unbeknownst to those who  
19  
20 257 have accessed the data) that can lead to false discovery rates [31]. Hybrid accessions in particular,  
21  
22 258 can potentially affect metagenome results predicated on short reads to a greater extent that would be  
23  
24 259 expected from analyses based on long reads, which have the potential to circumvent the effect of  
25  
26 260 hybrid accessions. Long reads can circumvent these issues assuming that much of the genome for  
27  
28 261 each component organism is represented in the sequencing library and that there are few errors in the  
29  
30 262 sequences and the comparative database. The results reported here allow us to consider the potential  
31  
32 263 for long read sequencing via MinION and subsequent metagenomic analysis. We found that for low  
33  
34 264 complexity synthetic communities, the results indicate that long reads provided by MinION R7.3 flow  
35  
36 265 cells provide sufficiently precise sequence data to assign groups represented at or above 1%. In fact,  
37  
38 266 2 of 5 species included at <0.05% in a mock community were detected. Furthermore, for un-  
39  
40 267 amplified whole genome preparations, read assignments were observed to be within about 10% of  
41  
42 268 their proportional occurrence in the metagenome. Ultimately, we saw that although the reads were  
43  
44 269 longer, because the sequence coverage was not as deep, the improvement in specificity of assignment  
45  
46 270 was offset by a reduction in the sensitivity, and some of the genomes present at low concentration  
47  
48 271 were not sequenced.

49  
50  
51  
52  
53  
54  
55  
56 272 The fact that the estimated proportions of community members were not precise despite  
57  
58 273 careful quantitation could indicate differences across library preparation (all libraries were prepared  
59  
60  
61  
62  
63  
64  
65

274 by BLB), reagent kits, flow cells, MinKNOW control scripts, the quality of DNAs used to create the  
1  
2 275 synthetic metagenomes, and the methods used for quantification (Qubit for the home-grown mixtures  
3  
4 276 and UV spectrophotometry for the 20-species mixture). Because DNA quality is of paramount  
5  
6 277 importance for MinION sequencing, PreCR (SQK-MAP005 protocol) or FFPE Repair Mix (SQK-  
7  
8 278 MAP006 protocol) was included in the preparation of all libraries. The potential for profound effects  
9  
10  
11 279 related to library preparation recently was examined [27] leading to the recommendation that studies  
12  
13 280 of complex metagenomes should be based on PCR-free approaches. The current data indicate that the  
14  
15 281 MinION lends itself well to a PCR-free approach but that utility for analysis of complex  
16  
17 282 metagenomes is limited at the current time by the small number of reads that pass the quality filtering  
18  
19 283 process. The current study also provides data for considering alternatives to PCR for amplification, in  
20  
21 284 this case GenomiPhi™, which was used to generate sufficient DNA for one library in the current  
22  
23 285 study (“Staggered”). This method is optimized for linear DNA and was intended to generate unbiased  
24  
25 286 copies of the 20-species genomes. Nevertheless, this pre-amplification step is one likely reason that  
26  
27 287 could account for the overrepresentation of *E. coli* and underrepresentation of *R. sphaeroides* in the  
28  
29 288 Staggered run. However, another distinct possibility that could account for incongruence of known  
30  
31 289 and estimated proportions in the Staggered community is that organisms for which there are many  
32  
33 290 accessions in the public databases provide for more precise classification (e.g., *E. coli* complete  
34  
35 291 genome accessions) and that *vice versa*, organisms with relatively few accessions (e.g., *R.*  
36  
37 292 *sphaeroides* accessions) result in less precise classification. A third possibility is that the original  
38  
39 293 DNA preparation for *R. sphaeroides* was less pure or more degraded than preparations for the other  
40  
41 294 19 species. A novel low input DNA approach recently reported [32] could enhance such MinION  
42  
43 295 analyses.  
44  
45  
46  
47  
48

49 296 Despite the rather small number of 2D reads that were observed to pass the quality filter  
50  
51 297 across all MinION runs, there was a strong biological signal in the data (Figure 2). Thus, as  
52  
53 298 investigators have found MinION useful for single genome introspection [4, 7, 13], 16S and other  
54  
55 299 amplicon resolution [14, 33], cDNA sequencing [9], and assembly [3, 34, 35], our findings imply that  
56  
57 300 this platform has immediate utility for analysis of very simple mixtures (e.g., serum testing for  
58  
59  
60  
61  
62  
63  
64  
65

1 301 pathogens). Over the 18-month period of MinION use for this set of experiments, 2D pass rates  
2 302 increased from 2% to 24%. That rate of improvement is concurrent with Moore's Law [36] and lends  
3  
4 303 support to the expectation that the platform will continue to improve for the foreseeable future. The  
5  
6 304 cloud-based WIMP base-calling and taxon prediction program associated with the device provides a  
7  
8 305 method of real-time analysis of metagenomic data. However, because we had no control over the  
9  
10 306 comparative database, the cloud implementation of WIMP was far less flexible for environmental  
11  
12 307 metagenomic analysis than local Kraken, and we note that use of an inappropriate or incomplete  
13  
14 308 database can lead to false positives and negatives. Further investigations of MinION output and data  
15  
16 309 analysis should focus on evaluation of the informative value of 1D reads, alternative alignment  
17  
18 310 algorithms, and more sophisticated k-mer analyses. As the quality rate for this platform improves, the  
19  
20 311 potential will increase for MinION to provide data for the majority of organisms that are included in  
21  
22 312 an environmental metagenome.  
23  
24  
25

## 26 313

## 27 314 **Methods**

## 28

29 315 To set a baseline of expectations for MinION metagenomic analysis, we performed single-species  
30  
31 316 sequencing runs with four organisms. Cell cultures at log phase were harvested by spinning 15 mL  
32  
33 317 culture tubes at  $3,000 \times g$  for 30 min and DNA was isolated using the PowerSoil DNA kit (MoBio,  
34  
35 318 Carlsbad, CA, USA) according to the manufacturer's instructions. Nucleic acid quality and quantity  
36  
37 319 were checked via Nanodrop 2000 and Qubit, whereafter 1  $\mu\text{g}$  of DNA was used to prepare sequencing  
38  
39 320 libraries. For the first two mixtures, equal portions of DNAs from all four organisms (250 ng each)  
40  
41 321 were used ("equal") and for the third mixture ("rare"), equivalent amounts of three of the species were  
42  
43 322 used (330 ng each) and *M. aeruginosa* was included as only 1% of the mixture (10 ng). An additional  
44  
45 323 preparation of a mock community containing 20 microbe species was obtained from a commercial  
46  
47 324 source (HM-783D, bei Resources, ATCC, Manassas, VA, USA). Because sequencing libraries for  
48  
49 325 this study began with 1  $\mu\text{g}$  of DNA, to generate sufficient starting material 1  $\mu\text{L}$  of the mock  
50  
51 326 community sample (5.5 ng of template) was pre-amplified using  $\Phi 29$  enzyme from the GenomiPhi  
52  
53  
54  
55  
56  
57  
58  
59  
60  
61  
62  
63  
64  
65

327 V3 kit (25-6601-24, GE Healthcare Bio-Sciences, Pittsburgh, PA, USA) according to the  
1  
2 328 manufacturer's recommendation.  
3

4 329 Sequencing libraries were prepared for R7.3 flow cells run on an original MinION device using  
5  
6 330 the Genomic DNA Sequencing Kit SQK-MAP005 according to the base protocol from Oxford  
7  
8 331 Nanopore with slight modifications [37] and for R7.3 flow cells run on the Mk1 device using the  
9  
10 332 Nanopore Sequencing Kit SQK-MAP006 according to the manufacturer's recommendations. The  
11  
12 333 steps for library SQK-MAP005 preparation included in this order: shearing 1  $\mu\text{g}$  in a Covaris g-  
13  
14 334 TUBE (Covaris, Inc., Woburn, MA, USA) at  $2,000 \times g$  for 2 min, treatment with PreCR (New  
15  
16 335 England Biolabs, Beverly, MA, USA), cleanup with 1X AMPure beads (Agencourt, Beckman  
17  
18 336 Coulter, Brea CA, USA), end-repair with NEBNext End Repair Module (New England Biolabs),  
19  
20 337 cleanup with 0.5X AMPure beads, dA-tailing with NEBNext dA-Tailing Module (New England  
21  
22 338 Biolabs), ligation to a cocktail of both the leader and hairpin sequencing adapters (Oxford Nanopore  
23  
24 339 Technologies) using Blunt TA Ligase (New England Biolabs), cleanup using his-tag Dynabeads (Life  
25  
26 340 Technologies, City, State, USA), and recovery of the pre-sequencing mix in 25  $\mu\text{L}$  of Elution Buffer  
27  
28 341 (Oxford Nanopore Technologies). After priming the flow cell with EP solution according to the  
29  
30 342 manufacturer's recommendations, an initial 6  $\mu\text{L}$  aliquot of the pre-sequencing mix (at 10-20  $\text{ng}/\mu\text{L}$ )  
31  
32 343 was combined with 141  $\mu\text{L}$  EP Solution and 3  $\mu\text{L}$  Fuel Mix and applied to the flow cell. Thereafter,  
33  
34 344 at 6-8 hr intervals, additional pre-sequencing mix aliquots (held on ice) combined with EP Solution  
35  
36 345 and Fuel Mix were added to the flow cell at times roughly coinciding with re-programmed pore  
37  
38 346 "remux," which is a process that adjusts the bias voltage and mux channels to maximize yield  
39  
40 347 performance. Modified scripts (J. Tyson, pers. comm.) caused the MinION device to perform four  
41  
42 348 remux steps at 8 h intervals to maintain regular increases in data (Figure 4).  
43  
44  
45  
46  
47  
48

49 349 Steps for library SQK-MAP006 preparation included in this order: shearing in a Covaris g-TUBE  
50  
51 350 (Covaris, Inc., Woburn, MA, USA) at  $2,000 \times g$  for 2 min, treatment with PreCR (New England  
52  
53 351 Biolabs, Beverly, MA, USA), cleanup with 1X AMPure beads (Agencourt, Beckman Coulter, Brea  
54  
55 352 CA, USA), combined end-repair and dA-tailing with NEBNext UltraII End Repair/dA-Tailing  
56  
57 353 Module (New England Biolabs), cleanup with 1X AMPure beads, ligation to a cocktail of both the  
58  
59  
60  
61  
62  
63  
64  
65

354 leader and hairpin sequencing adapters (Oxford Nanopore Technologies) using Blunt TA Ligase  
1  
2 355 (New England Biolabs), addition of a tether to the hairpin segment, cleanup using MyOne  
3  
4 356 Streptavidin C1 Beads (Life Technologies, Carlsbad, CA, USA), and recovery of the pre-sequencing  
5  
6 357 mix in 25  $\mu$ L of Elution Buffer (Oxford Nanopore Technologies). After priming the flow cell with  
7  
8  
9 358 running buffer and fuel according to the manufacturer's recommendations, an initial 6  $\mu$ L aliquot of  
10  
11 359 the pre-sequencing mix (at 10-20 ng/ $\mu$ L) was combined with 75  $\mu$ L Running Buffer, 65  $\mu$ L water, and  
12  
13  
14 360 4  $\mu$ L Fuel Mix and applied to the flow cell. Thereafter, at 8 hr intervals, additional pre-sequencing  
15  
16 361 mix aliquots (held on ice) were combined with Running Buffer and Fuel Mix and added to the flow  
17  
18 362 cell at times roughly coinciding with re-programmed pore remix (modified scripts from J. Tyson,  
19  
20 363 pers. comm.) Modified remix scripts were not used for the final MinION Mk1 run (Staggered  
21  
22 364 community analysis) because that run was controlled by a new version of MinKNOW.

25 365 Comparative data sets were generated for each of the four single species templates using  
26  
27 366 full length ~1500 bp Sanger sequencing of a 16S amplicon. Reads from the 16S analysis  
28  
29  
30 367 were subjected to BlastN for taxonomic assignment. Data from the MinION were accessed  
31  
32 368 on the MG-RAST server and annotated based on their predicted proteins and rRNA genes.

35 369

### 37 370 **Figure 1 Result of "What's in my pot."**

39 371 Rendering of real-time analysis using WIMP [20] of whole genome sequences from a  
40  
41  
42 372 synthetic mixture prepared from equal DNA quantities of four cultured microbe species  
43  
44 373 (experiment "Equal Mk1") and run on the MinION™ sequencing platform. Arc angle is  
45  
46  
47 374 proportional to the number of reads assigned to the indicated species. Colors (scale at bottom  
48  
49 375 of diagram) refer to the classification score threshold (for this analysis the threshold for  
50  
51  
52 376 inclusion was 0.01).

54 377

56 378 **Figure 2 Principal component analysis of normalized 5-mer frequency (i.e., percentage)**  
57  
58 379 **within each MinION™ read.**



380 Performed for runs with equal portions of four species and with three equal and one rare  
1  
2 381 species included in the DNA pool. “none”: read had no BlastN hits. “other”: read had  
3  
4  
5 382 BlastN hits but not one of the four species included in the mix.  
6

7 383

8  
9 **384 Figure 3 Log abundance of reads assigned from staggered mixture.**

10  
11 385 DNA of 20 species mixed in various proportions (bei Resources, ATCC, HM-783D, operon  
12  
13  
14 386 counts  $\mu\text{L}^{-1}$  in original mixture indicated along bottom margin of bars), was pre-amplified  
15  
16 387 with  $\Phi 29$  polymerase prior to library preparation and sequenced with MinION™. The 2D  
17  
18  
19 388 pass reads were assigned to taxa using Kraken. Colored bars are species included in the mix  
20  
21 389 whereas gray bars indicate species detected but not included in the original DNA mixture.  
22  
23

24 390

25  
26 **391 Figure 4 Read production using a MinION™ Mk1 device and an R7.3 flow cell.**

27  
28  
29 392 Shows reads collected from a synthetic metagenome made with equal DNA amounts from  
30  
31 393 four microbes and a library prepared using SQK-MAP006 kit. Arrows indicate approximate  
32  
33  
34 394 times when additional aliquots of library and fuel were added.  
35

36 395

37  
38 **396 Availability and requirements**

- 39  
40  
41 397
  - Project name: Experimental Metagenome on MinION

42  
43 398
  - Project home page: <https://github.com/gigascience/paper> link will be here.

44  
45  
46 399
  - Operating system: Unix

47  
48 400
  - Programming language: Bash and R

49  
50  
51 401
  - Other requirements: Unix

52  
53 402
  - License: N/A

54  
55

56 403

57  
58 **404 Availability of supporting data**

59  
60  
61  
62  
63  
64  
65

1 405 The datasets supporting the results of this article are available in the GigaDB repository

2 406 [Brown et al. 2016] and MG-RAST 4629367.3, 4629445.3, 4629369.3, 4629381.3,

3  
4 407 4614572.3, 4685746.3, 4685745.3, 4705090.3

5  
6  
7 408

8  
9  
10 409 **Competing interests**

11 410 BLB, MW, MCR, and RBF are enrolled in the Oxford Nanopore MinION™ Access

12  
13  
14 411 Programme (MAP) and received free materials for this research. KPK has no competing

15  
16  
17 412 interests.

18  
19 413

20  
21  
22 414 **Authors' contributions**

23  
24 415 BLB conceived of the study, performed the DNA extraction and sequencing, directed the

25  
26 416 data analysis, and drafted the manuscript. KPK provided data analysis, bioinformatics, and

27  
28  
29 417 annotation. MW provided bioinformatic analyses and statistical analyses. MCR participated

30  
31 418 in study design, sequence alignment, and bioinformatic analysis. RBF participated in study

32  
33  
34 419 design, sequencing, data analysis, and manuscript preparation. All authors read and approved

35  
36 420 the final manuscript.

37  
38  
39 421

40  
41 422 **Acknowledgements**

42  
43  
44 423 This work was supported by the Virginia Commonwealth University Department of Biology

45  
46 424 (BLB, MCR, RBF), by GenEco, LLC, Richmond, Virginia to BLB, and funding for MW was

47  
48  
49 425 from the Biotechnology and Biological Sciences Research Council including Institute

50  
51 426 Strategic Programme and National Capability grants (BBSRC; BBS/E/D/20310000,

52  
53 427 BB/J004243/1, BB/M020037/1). The authors acknowledge Kensie Barker (VCU) for

54  
55  
56 428 assistance with culturing bacteria. John Tyson (UBC) provided runtime plots and wrote the

57  
58 429 python scripts used to control the MinION device during the run. Hugh Eaves (VCU)

59  
60  
61  
62  
63  
64  
65

430 provided programming assistance. Sarah Highlander (Venter Inst.) provided advice on  
1  
2 431 determining DNA concentration. Michael Micorescu (ONT) provided assistance with  
3  
4  
5 432 Kraken.  
6

7 433

8  
9  
10 434 **List of abbreviations**

11  
12 435 MAP: MinION™ Access Programme

13  
14  
15 436 2D: refers to sequences where both the template and the complement were completed  
16  
17 437 (bidirectional) and passed the Metrichor quality threshold (Q9)

18  
19 438

20  
21  
22 439 **References**

23  
24 440 1. Kasianowicz JJ, Brandin E, Branton D, Deamer DW. Characterization of individual  
25  
26 441 polynucleotide molecules using a membrane channel. *Proc Natl Acad Sci.*  
27  
28  
29 442 1996;93:13770–73.

30  
31  
32 443 2. Eisenstein M. Oxford Nanopore announcement sets sequencing sector abuzz. *Nat*  
33  
34  
35 444 *Biotechnol.* 2012;30:295–6.

36  
37  
38 445 3. Loman NJ, Quick J, Simpson JT. A complete bacterial genome assembled de novo using  
39  
40  
41 446 only nanopore sequencing data. *Nat Methods.* 2015;12:733–5.

42  
43  
44 447 4. Goodwin S, Gurtowski J, Ethe-Sayers S, Deshpande P, Schatz M, McCombie WR. Oxford  
45  
46 448 Nanopore sequencing and de novo assembly of a eukaryotic genome. *Genome Res.*  
47  
48  
49 449 2015a;25:1-7.

50  
51  
52 450 5. Risse J, Thomson M, Blakely G, Koutsovoulos G, Blaxter M, Watson M. A single  
53  
54  
55 451 chromosome assembly of *Bacteroides fragilis* strain BE1 from Illumina and MinION  
56  
57 452 nanopore sequencing data. *GigaScience* 2015;4:60.  
58  
59  
60  
61  
62  
63  
64  
65

- 453 6. Quick J, Ashton P, Calus S, Chatt C, Gossain S, et al. Rapid draft sequencing and real-time  
1  
2 454 nanopore sequencing in a hospital outbreak of *Salmonella*. *Genome Biol*.  
3  
4  
5 455 2015;16:114.  
6  
7
- 8 456 7. Madoui M-A, Engelen S, Cruaud C, Belser C, Bertrand L, et al. Genome assembly using  
9  
10 457 nanopore-guided long and error-free DNA reads. *BMC Genomics*. 2015;16:327.  
11  
12  
13
- 14 458 8. Mongan AE, Yusuf I, Wahid I, Hatta M. The evaluation on molecular techniques of  
15  
16 459 reverse transcription loop-mediated isothermal amplification (RT-LAMP), reverse  
17  
18 460 transcription polymerase chain reaction (RT-PCR), and their diagnostic results on  
19  
20  
21 461 MinION™ nanopore sequencer for the detection of dengue virus serotypes. *Am J*  
22  
23  
24 462 *Microbiol Res*. 2015;3:118-24.  
25  
26
- 27 463 9. Hargreaves AD, Mulley JF. Snake venom gland cDNA sequencing using the Oxford  
28  
29 464 nanopore MinION portable DNA sequencer. *PeerJ*. 2015 Nov 24;3:e1441. doi:  
30  
31  
32 465 10.7717/peerj.1441. eCollection 2015.  
33  
34
- 35 466 10. Bolisetty MT, Rajadinakaran G, Graveley BR. Determining exon connectivity in complex  
36  
37 467 mRNAs by nanopore sequencing. *Genome Biol*. 2015; 16:204.  
38  
39  
40
- 41 468 11. Cao MD, Ganesamoorthy D, Elliott A, Zhang H, Cooper M, Coin L. Streaming  
42  
43 469 algorithms for identification of pathogens and antibiotic resistance potential from  
44  
45  
46 470 real-time MinION sequencing. *bioRxiv* 2015; doi: <http://dx.doi.org/10.1101/019356>.  
47  
48
- 49 471 12. Judge K, Harris SR, Reuter S, Parkhill J, Peacock SH. Early insights into the potential of  
50  
51 472 the Oxford Nanopore MinION for the detection of antimicrobial resistance genes. *J*  
52  
53  
54 473 *Antimicrob Chemother* 2015; doi:10.1093/jac/dkv206.  
55  
56
- 57 474 13. Wang J, Moore NE, Deng Y-M, Eccles DA, Hall RJ. MinION nanopore sequencing of an  
58  
59 475 influenza genome. *Front Microbiol*. 2015;6:766.  
60  
61  
62  
63  
64  
65

- 476 14. Kilianski A, Haas JL, Corriveau EJ, Liem AT, Willis KL, et al. Bacterial and viral  
1  
2 477 identification and differentiation by amplicon sequencing on the MinION nanopore  
3  
4  
5 478 sequencer. *GigaScience* 2015;4:12.  
6  
7
- 8 479 15. Greninger AL, Naccache SN, Federman S, Yu G, Mbala P, et al. Rapid metagenomic  
9  
10 480 identification of viral pathogens in clinical samples by real-time nanopore sequencing  
11  
12  
13 481 analysis. *Genom Med.* 2015;7:99.  
14  
15
- 16 482 16. Brown BL, Keegan KP, Watson M, Rivera MC, Franklin RB. Whole genome data from  
17  
18  
19 483 synthetic metagenomes. *GigaScience Database.* 2016. <http://xxxxxx>.  
20  
21
- 22 484 17. Watson M, Thomson M, Risse J, Talbot R, Santoyo-Lopez J, et al. poRe: an R package  
23  
24  
25 485 for the visualization and analysis of nanopore sequencing data. *Bioinformatics.*  
26  
27 486 2015;31:114-5.  
28  
29
- 30 487 18. Loman NJ, Quinlan AR. Poretools: a toolkit for analyzing nanopore sequence data.  
31  
32  
33 488 *Bioinformatics.* 2014; 30:3399–3401.  
34  
35
- 36 489 19. Leggett RM, Heavens D, Caccamo M, et al.: NanoOK: Multi-reference alignment  
37  
38  
39 490 analysis of nanopore sequencing data, quality, and error profiles. *Bioinformatics.*  
40  
41 491 2015;32:142-4.  
42  
43
- 44 492 20. Juul S, Izquierdo F, Hurst A, Dai X, Wright A, Kulesha E, Pettett R, Turner D. What's in  
45  
46  
47 493 my pot? Real-time species identification on the MinION™. *bioRxiv.* 2015; doi:  
48  
49 494 <http://dx.doi.org/10.1101/030742>.  
50  
51
- 52 495 21. Altschul SF, Madden TL, Schaffer AA, Zhang J, Zhang Z, Miller W, Lipman DJ. Gapped  
53  
54  
55 496 BLAST and PSI-BLAST: a new generation of protein database search programs. *Nucl*  
56  
57 497 *Acids Res.* 1997;25:3389.  
58  
59  
60  
61  
62  
63  
64  
65

- 498 22. Wood DE, Salzberg SL. Kraken: ultrafast metagenomic sequence classification using  
1 exact alignments. *Genome Biol.* 2014;15:R46.  
2 499  
3  
4  
5  
6 500 23. Meyer F, Paarmann D, D'Souza M, Olson R, Glass EM, et al. The metagenomics RAST  
7 server – a public resource for the automatic phylogenetic and functional analysis of  
8 501 metagenomes. *BMC Bioinfo.* 2008;9:386.  
9  
10  
11 502  
12  
13  
14 503 24. R Core Team. R: A language and environment for statistical computing. R Foundation for  
15 Statistical Computing, Vienna, Austria. 2015;<https://www.R-project.org/>.  
16 504  
17  
18  
19 505 25. Park H-D, Sasaki Y, Maruyama T, Yanagisawa E, Hiraishi A, Kato K. Degradation of the  
20 cyanobacterial hepatotoxin microcystin by a new bacterium isolated from a  
21 hypertrophic lake. *Environ Toxicol* 2001;16:337-43.  
22 506  
23  
24 507  
25  
26  
27 508 26. Thomas T, Gilbert J, Meyer F. Metagenomics – a guide from sampling to data analysis. *Microb*  
28 *Inform Experim.* 2012;2:3.  
29 509  
30  
31  
32  
33 510 27. Jones MB, Highlander SK, Anderson EL, Li W, Dayrit M, et al. Library preparation  
34 methodology can influence genomic and functional predictions in human microbiome  
35 511 research. *Proc Nat Acad Sci.* 2015;45:14024-9.  
36 512  
37  
38  
39  
40  
41 513 28. Wommack KE, Bhavsar J, Ravel J. Metagenomics: Read Length Matters. *Appl Environ*  
42 *Microbiol.* 2008;74:1453.  
43 514  
44  
45  
46  
47 515 29. Brown BL, LePrell RV, Franklin RB, Rivera MC, Cabral FC, et al. Metagenomic  
48 analysis of planktonic microbial consortia from a non-tidal urban-impacted segment  
49 516 of James River. *Stand Genomic Sci.* 2015;10:65.  
50 517  
51  
52  
53  
54  
55 518 30. Magasin JD, Gerloff DL. Pooled assembly of marine metagenomic datasets: enriching annotation  
56 through chimerism. *Bioinformatics.* 2015;31:311-317.  
57 519  
58  
59  
60  
61  
62  
63  
64  
65

520 31. Freitas TAK, Li P-E, Scholz MB, Chain PSG. Accurate read-based metagenome  
1  
2 521 characterization using a hierarchical suite of unique signatures. Nucl Acids Res. 2015;  
3  
4  
5 522 doi: 10.1093/nar/gkv180.  
6  
7  
8 523 32. Li C, Chng KR, Boey EJH, Ng AHQ, Wilm A, Nagarajan N. INC-Seq: accurate single  
9  
10 524 molecule reads using nanopore sequencing. GigaScience. 2016;5:34  
11  
12  
13  
14 525 33. Benítez-Páez A, Portune KJ, Sanz Y. Species-level resolution of 16S rRNA gene  
15  
16 526 amplicons sequenced through the MinION™ portable nanopore sequencer.  
17  
18  
19 527 GigaScience. 2016;5:4.  
20  
21  
22 528 34. Goodwin S, Gurtowski J, Ethe-Sayers S, Deshpande P, Schatz M, McCombie WR.  
23  
24 529 Oxford Nanopore sequencing, hybrid error correction, and *de novo* assembly of a  
25  
26  
27 530 eukaryotic genome. Genome Res. 2015b;25:1750-6.  
28  
29  
30 531 35. Karlsson E, Lärkeryd A, Sjödin A, Forsman M, Stenberg P. Scaffolding of a bacterial  
31  
32 532 genome using MinION nanopore sequencing. Scientif Rep 2015;5:11996.  
33  
34  
35  
36 533 36. Stephens ZD, Lee SY, Faghri F, Campbell RH, Zhai C, et al. Big data: astronomical or  
37  
38 534 genomics? PLoS Biol. 2015;13:e1002195. doi:10.1371/journal.pbio.1002195.  
39  
40  
41  
42 535 37. Ip CLC, Loose M, Tyson JR, Cesare M, Brown BL, et al. MinION Analysis and  
43  
44 536 Reference Consortium: Phase 1 data release and analysis. F1000Research  
45  
46  
47 537 2015;4:1075.  
48  
49  
50  
51  
52  
53  
54  
55  
56  
57  
58  
59  
60  
61  
62  
63  
64  
65

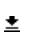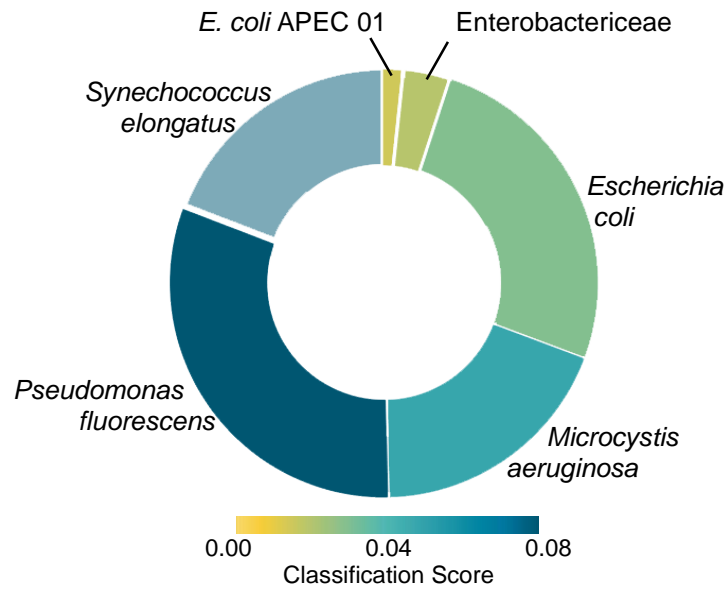



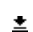

A

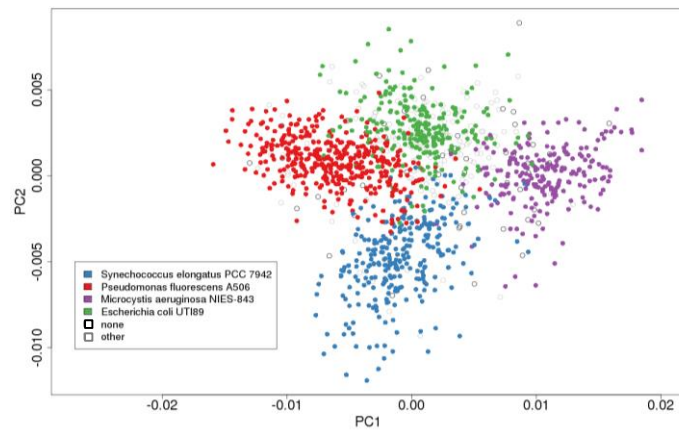

B

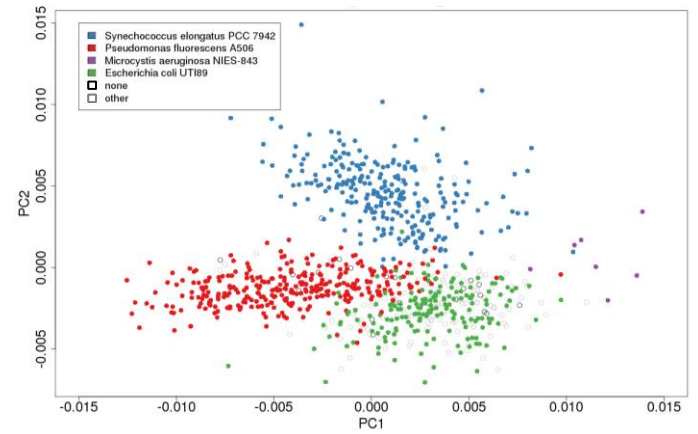



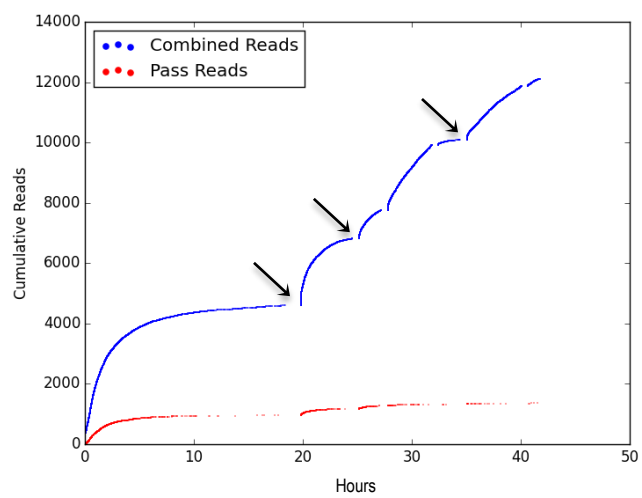

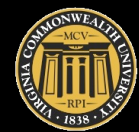**VCU**

Virginia Commonwealth University  
College of Humanities and Sciences  
**Department of Biology**  
**Ecological Genetics Laboratory**

1000 West Cary Street  
P.O. Box 842012  
Richmond, Virginia 23284-2012  
804-828-3265 voice  
804-828-0503 fax  
800-828-1120 TDD

16 August 2016

We respectfully submit the attached manuscript entitled, “MinION™ nanopore sequencing of environmental metagenomes: a synthetic approach,” for consideration for publication in GigaScience.

We have selected GigaScience as the venue to share our results with the world for two primary reasons. First, a number of other MinION papers are located in this journal so our work will likely be seen by others who are considering use of this sequencing platform. Second, because a number of other metagenomic studies are published in this journal, we believe that our work will be noted by researchers who are

Our manuscript is worthy of publication in GigaScience because it is well-conceived, considers in depth the consequences of long read sequencing of both simple and complex mixtures, and provides clear guidance for selecting analytical tools for long read sequence data analysis.

We take no exception to any issues relating to journal policies.

We have declared in the manuscripts our potential competing interests as follows: the contact author, Bonnie Brown, along with two other VCU authors (Maria Rivera and Rima Franklin) are members of the VCU MinION Access Programme. Mick Watson also is a member of this program. Kevin Keegan is not and has no other identifiable competing interests.

All authors have contributed to writing and have approved the manuscript for submission.

The content of this manuscript has not been published, nor has it been submitted for publication, elsewhere.

Sincerely,

A handwritten signature in cursive script that reads "Bonnie L. Brown".

Bonnie L. Brown, Ph.D.

Professor and Associate Chair of Biology  
Director, VCU Ecological Genetics Laboratory
